# Supplementary material for: Estimating dry biomass and plant nitrogen concentration in pre-Alpine grasslands with low-cost UAS-borne multispectral data – a comparison of sensors, algorithms, and predictor sets
Source: Copernicus journal article supplement (doi:10.5194/bg-2021-250), 2021-10-20
Supplement: Supplementary file 1 [file bg-2021-250-supplement.pdf]

## Supplementary material – table of concentration

### Supplementary Tables

|                                                                                    |   |
|------------------------------------------------------------------------------------|---|
| Table ST1. Used vegetation indices .....                                           | 2 |
| Table ST2. Calibrated hyper-parameters for DM and N concentration estimation ..... | 3 |
| Table ST3. Overview about model quality parameters .....                           | 4 |
| Table ST4. Mean variable importance .....                                          | 6 |

### Supplementary Figures

|                                                                                                              |           |
|--------------------------------------------------------------------------------------------------------------|-----------|
| Figure SF1. Changes of best error in parameter calibration .....                                             | 8         |
| Figure SF2. Parameter convergence diagnosis by normalized distance .....                                     | 9         |
| Figure SF3. Comparison of model quality parameters between REM and SEQ data .....                            | 10        |
| Figure SF4. Comparison of model quality parameters between the ML algorithms GBM and RF .....                | 10        |
| Figure SF5. Comparison of model quality parameters between different predictor sets .....                    | 10        |
| Figure SF6. Prediction plots of DM for cross-validation sites (FE + RB) with REM/SEQ Data .....              | 11        |
| Figure SF7. Prediction plots of N concentration for cross-validation sites (FE + RB) with REM/SEQ Data ..... | 13        |
| Figure SF8. Prediction plots of DM for validation site (EL) with SEQ data .....                              | 15        |
| Figure SF9. Prediction plots of N concentration for validation site (EL) with SEQ data .....                 | 16        |
| Figure SF10. Spatial estimations for RB-South site .....                                                     | 17        |
| Figure SF11. Spatial estimations for FE site .....                                                           | 18        |
| Figure SF12. Spatial estimations for EL-North site .....                                                     | 19        |
| Figure SF13. Spatial estimations for EL-South site .....                                                     | 20        |
| <b>References of supplementary material .....</b>                                                            | <b>21</b> |

**Table ST1.** Used vegetation indices. Ratio, orthogonal, hybrid, red edge, and modified chlorophyll indices were selected from overview of Asam (2014) and other VI from summary of Ollinger (2011). BLUE, GREEN, RED, RE, NIR = reflectance value of blue, green, red, red-edge and near-infrared band. If the reference stated a specific wavelength in their formula, we attributed the corresponding broad band (blue, green, red, red-edge, NIR) to it.

| Abbreviation                                                                      | Name                                                    | Formula                                                                                                            | Reference                               |
|-----------------------------------------------------------------------------------|---------------------------------------------------------|--------------------------------------------------------------------------------------------------------------------|-----------------------------------------|
| <b>Ratio indices</b>                                                              |                                                         |                                                                                                                    |                                         |
| SR                                                                                | Simple Ratio                                            | $NIR / RED$                                                                                                        | Jordan, 1969; Pearson et al., 1972      |
| NDVI                                                                              | Normalized Difference Vegetation Index                  | $(NIR - RED) / (NIR + RED)$                                                                                        | Rouse et al., 1974                      |
| RDVI                                                                              | Renormalized Difference Vegetation Index                | $(NIR - RED) / (\sqrt{NIR + RED})$                                                                                 | Roujean and Breon, 1995                 |
| ARVI                                                                              | Atmospherically Resistant Vegetation Index              | $(NIR - (RED - (BLUE - RED))) / (NIR + (RED - (BLUE - RED)))$                                                      | Kaufman and Tanre, 1992                 |
| MSR1                                                                              | Modified Simple Ratio 1                                 | $(NIR / RED - 1) / (\sqrt{NIR / RED + 1})$                                                                         | Chen, 1996                              |
| MSR2                                                                              | Modified Simple Ratio 2                                 | $(NIR - BLUE) / (RED - BLUE)$                                                                                      | Sims and Gamon, 2002                    |
| <b>Orthogonal indices</b>                                                         |                                                         |                                                                                                                    |                                         |
| DVI                                                                               | Difference Vegetation Index                             | $NIR - RED$                                                                                                        | Jordan, 1969                            |
| <b>Hybrid indices</b>                                                             |                                                         |                                                                                                                    |                                         |
| SAVI                                                                              | Soil Adjusted Vegetation Index                          | $((1 + L) * (NIR - RED)) / (NIR + RED + L); L = 0.5$                                                               | Huete, 1988                             |
| OSAVI                                                                             | Optimised Soil Adjusted Vegetation Index                | $(1 + 0.16) * ((NIR - RED) / (NIR + RED + 0.16))$                                                                  | Rondeaux et al., 1996                   |
| MSAVI                                                                             | Modified Soil Adjusted Vegetation Index                 | $0.5 * (2 * NIR + 1 - \sqrt{(2 * NIR + 1)^2 - 8 * (NIR - RED)})$                                                   | Qi et al., 1994                         |
| SARVI                                                                             | Soil and Atmosphere Resistant Vegetation Index          | $(1 + L) * ((NIR - (RED - (BLUE - RED))) / (NIR + (RED - (BLUE - RED)) + 0.5)); L = 0.5$                           | Kaufman and Tanre, 1992                 |
| EVI                                                                               | Enhanced Vegetation Index                               | $2.5 * (NIR - RED) / (1 + NIR + C1 * RED - C2 * BLUE); C1 = 6, C2 = 7.5$                                           | Huete et al., 2002                      |
| <b>Red edge indices</b>                                                           |                                                         |                                                                                                                    |                                         |
| MSRre                                                                             | Modified Red Edge Simple Ratio                          | $(NIR - BLUE) / (RE - BLUE)$                                                                                       | Sims and Gamon, 2002                    |
| NDVire                                                                            | NDVI Red Edge                                           | $(NIR - RE) / (NIR + RE)$                                                                                          | Gitelson and Merzlyak, 1994             |
| RRI1                                                                              | Red edge Ratio Index 1                                  | $NIR / RE$                                                                                                         | Ehammer et al., 2010                    |
| RRI2                                                                              | Red edge Ratio Index 2                                  | $RE / RED$                                                                                                         | Ehammer et al., 2010                    |
| <b>Modified chlorophyll indices</b>                                               |                                                         |                                                                                                                    |                                         |
| MCARI                                                                             | Modified Chlorophyll Absorption Ratio Index             | $((RE - RED) - 0.2 * (RE - GREEN)) * (RE / RED)$                                                                   | Daughtry et al., 2000                   |
| MCARI1                                                                            | Modified Chlorophyll Absorption Ratio Index 1           | $1.2 * (2.5 * (NIR - RED) - 1.3 * (NIR - GREEN))$                                                                  | Haboudane et al., 2004                  |
| MCARI2                                                                            | Modified Chlorophyll Absorption Ratio Index 2           | $(1.5 * (2.5 * (NIR - RED) - 1.3 * (NIR - GREEN))) / (\sqrt{(2 * NIR + 1)^2} - (6 * NIR - 5 * \sqrt{RED})) - 0.5)$ | Haboudane et al., 2004                  |
| MTVI                                                                              | Modified Triangular Vegetation Index                    | $1.2 * (1.2 * (NIR - GREEN) - 2.5 * (RED - GREEN))$                                                                | Haboudane et al., 2004                  |
| <b>other VI (more dedicated to chlorophyll; originally hyperspectral indices)</b> |                                                         |                                                                                                                    |                                         |
| Datts                                                                             | Datts Index                                             | $(NIR - RE) / (NIR - RED)$                                                                                         | Datt, 1999                              |
| aDVI                                                                              | Adjusted Difference Vegetation Index                    | $NIR - ((GREEN + RED)/2)$                                                                                          | Broge and Leblanc, 2001                 |
| GNDVI                                                                             | Green Normalized Difference Vegetation Index            | $(NIR - ((BLUE - GREEN)/2)) / (NIR + ((BLUE + GREEN)/2))$                                                          | Gitelson and Merzlyak, 1997             |
| PSSR <sub>c</sub>                                                                 | Pigment-specific simple ration for carotenoids          | $NIR / BLUE$                                                                                                       | Blackburn, 1998                         |
| RARS <sub>a</sub>                                                                 | Ratio analysis of reflectance spectra for chlorophyll a | $RED / RE$                                                                                                         | Blackburn, 1999; Chappelle et al., 1992 |
| SIPI                                                                              | Structure-insensitive pigment index                     | $(NIR - BLUE) / (NIR - RED)$                                                                                       | Penuelas et al., 1995                   |

**Table ST2.** Calibrated hyper-parameters for DM and N concentration estimation. ML parameters calibrated using Bayesian calibration in 500 iterations. The best parameter values were selected by lowest error. The unit of error of DM is  $\text{g m}^{-2}$  and of the N concentration is wt.%.

| Response            | ML algorithm        | ML parameter                       | Sensor    | PS1       | PS2       | PS3      | PS4      | PS5      | PS6      |          |          |
|---------------------|---------------------|------------------------------------|-----------|-----------|-----------|----------|----------|----------|----------|----------|----------|
| DM                  | GBM                 | Shrinkage                          | REM       | 1.02E-02  | 2.71E-04  | 2.83E-04 | 4.94E-05 | 6.81E-02 | 3.58E-03 |          |          |
|                     |                     |                                    | SEQ       | 9.77E-05  | 8.90E-02  | 7.91E-05 | 1.16E-04 | 8.30E-05 | 4.27E-05 |          |          |
|                     |                     |                                    | REMwoBlue | 6.50E-04  | 1.98E-04  | 1.10E-03 | 1.00E-04 | 7.03E-04 | 9.98E-05 |          |          |
|                     |                     | Interaction depth                  | REM       | 5         | 4         | 3        | 3        | 5        | 6        |          |          |
|                     |                     |                                    | SEQ       | 2         | 4         | 3        | 3        | 6        | 6        |          |          |
|                     |                     |                                    | REMwoBlue | 5         | 5         | 1        | 4        | 4        | 2        |          |          |
|                     |                     | N <sub>tree</sub>                  | REM       | 2000      | 25748     | 33785    | 49993    | 2028     | 2010     |          |          |
|                     |                     |                                    | SEQ       | 21870     | 12906     | 49985    | 49993    | 49994    | 43559    |          |          |
|                     |                     |                                    | REMwoBlue | 12649     | 39810     | 13422    | 40750    | 33557    | 49992    |          |          |
|                     |                     | Lowest error ( $\text{g m}^{-2}$ ) | REM       | 51.58     | 54.48     | 51.33    | 52.48    | 45.81    | 43.82    |          |          |
|                     |                     |                                    | SEQ       | 60.99     | 58.37     | 57.98    | 54.38    | 48.49    | 49.90    |          |          |
|                     |                     |                                    | REMwoBlue | 53.41     | 51.35     | 51.05    | 54.23    | 47.35    | 45.36    |          |          |
|                     | RF                  | m <sub>try</sub>                   | REM       | 5         | 5         | 9        | 1        | 3        | 23       |          |          |
|                     |                     |                                    | SEQ       | 1         | 13        | 15       | 1        | 2        | 14       |          |          |
|                     |                     |                                    | REMwoBlue | 4         | 3         | 4        | 1        | 3        | 13       |          |          |
|                     |                     | Node size                          | REM       | 4         | 1         | 5        | 5        | 3        | 3        |          |          |
|                     |                     |                                    | SEQ       | 2         | 5         | 3        | 3        | 5        | 1        |          |          |
|                     |                     |                                    | REMwoBlue | 2         | 3         | 1        | 5        | 5        | 5        |          |          |
|                     |                     | N <sub>tree</sub>                  | REM       | 8511      | 500       | 3471     | 2992     | 1266     | 8648     |          |          |
|                     |                     |                                    | SEQ       | 6420      | 9048      | 3282     | 7706     | 7929     | 4878     |          |          |
|                     |                     |                                    | REMwoBlue | 1244      | 5015      | 7687     | 9694     | 2827     | 7774     |          |          |
|                     |                     | Lowest error ( $\text{g m}^{-2}$ ) | REM       | 49.05     | 47.52     | 47.38    | 54.46    | 43.85    | 40.92    |          |          |
|                     |                     |                                    | SEQ       | 61.32     | 55.62     | 57.43    | 59.13    | 47.88    | 46.22    |          |          |
|                     |                     |                                    | REMwoBlue | 47.09     | 47.65     | 47.37    | 59.12    | 43.42    | 40.34    |          |          |
|                     |                     | N concentration                    | GBM       | Shrinkage | REM       | 1.95E-04 | 3.26E-02 | 4.56E-04 | 5.86E-06 | 6.25E-02 | 7.48E-02 |
|                     |                     |                                    |           |           | SEQ       | 2.48E-04 | 2.60E-02 | 1.15E-02 | 5.39E-07 | 7.73E-04 | 6.80E-02 |
|                     |                     |                                    |           |           | REMwoBlue | 1.84E-03 | 8.80E-05 | 1.90E-04 | 5.35E-05 | 8.27E-04 | 1.67E-04 |
| Interaction depth   | REM                 |                                    |           | 2         | 3         | 3        | 1        | 3        | 1        |          |          |
|                     | SEQ                 |                                    |           | 6         | 1         | 1        | 3        | 6        | 4        |          |          |
|                     | REMwoBlue           |                                    |           | 3         | 4         | 5        | 1        | 3        | 3        |          |          |
| N <sub>tree</sub>   | REM                 |                                    |           | 31385     | 2000      | 42101    | 2495     | 41388    | 35717    |          |          |
|                     | SEQ                 |                                    |           | 39916     | 2016      | 2003     | 9794     | 25239    | 2004     |          |          |
|                     | REMwoBlue           |                                    |           | 5268      | 49995     | 34011    | 2034     | 13797    | 50000    |          |          |
| Lowest error (wt.%) | REM                 |                                    |           | 0.50      | 0.53      | 0.52     | 0.57     | 0.51     | 0.49     |          |          |
|                     | SEQ                 |                                    |           | 0.48      | 0.48      | 0.46     | 0.62     | 0.47     | 0.47     |          |          |
|                     | REMwoBlue           |                                    |           | 0.50      | 0.53      | 0.51     | 0.62     | 0.50     | 0.50     |          |          |
| RF                  | m <sub>try</sub>    |                                    | REM       | 1         | 9         | 9        | 1        | 2        | 17       |          |          |
|                     |                     |                                    | SEQ       | 1         | 17        | 19       | 1        | 1        | 18       |          |          |
|                     |                     |                                    | REMwoBlue | 2         | 1         | 9        | 1        | 3        | 22       |          |          |
|                     | Node size           |                                    | REM       | 5         | 1         | 5        | 4        | 3        | 4        |          |          |
|                     |                     |                                    | SEQ       | 4         | 5         | 5        | 5        | 2        | 1        |          |          |
|                     |                     |                                    | REMwoBlue | 5         | 5         | 5        | 4        | 4        | 5        |          |          |
|                     | N <sub>tree</sub>   |                                    | REM       | 6800      | 5336      | 10000    | 7102     | 500      | 2738     |          |          |
|                     |                     |                                    | SEQ       | 10000     | 7268      | 10000    | 9566     | 8362     | 2026     |          |          |
|                     |                     |                                    | REMwoBlue | 4563      | 5070      | 9356     | 3749     | 6097     | 5144     |          |          |
|                     | Lowest error (wt.%) |                                    | REM       | 0.48      | 0.47      | 0.46     | 0.67     | 0.46     | 0.45     |          |          |
|                     |                     |                                    | SEQ       | 0.47      | 0.45      | 0.45     | 0.71     | 0.46     | 0.44     |          |          |
|                     |                     |                                    | REMwoBlue | 0.47      | 0.48      | 0.48     | 0.71     | 0.45     | 0.46     |          |          |

**Table ST3.** Overview of the DM models and cross-validation evaluation metrics for all combinations of sensors (REM, SEQ), predictor sets (PS1: raw reflectance data; PS2: VI; PS3: raw reflectance data + VI; PS4: canopy height; PS5: raw reflectance data + canopy height; PS6: raw reflectance data + VI + canopy height), and ML algorithms (GBM, RF). The unit of  $RMSE_{cv}$  and absolute  $bias_{cv}$  is  $g\ m^{-2}$  for DM and wt.% for N concentration. All metric values of single sensor-predictors-algorithm combinations are averages of the 10 iterations.  $N_{obs, DM} = 82$ ,  $N_{obs, N} = 81$ .

| DM     |     |         |            |             |              |             | N concentration |     |         |            |             |              |             |
|--------|-----|---------|------------|-------------|--------------|-------------|-----------------|-----|---------|------------|-------------|--------------|-------------|
| Sensor | PS  | Model   | $R^2_{cv}$ | $RMSE_{cv}$ | $RRMSE_{cv}$ | $Bias_{cv}$ | Sensor          | PS  | Model   | $R^2_{cv}$ | $RMSE_{cv}$ | $RRMSE_{cv}$ | $Bias_{cv}$ |
| REM    | PS1 | GBM     | 0.47       | 53.92       | 0.16         | 0.34        | REM             | PS1 | GBM     | 0.31       | 0.51        | 0.16         | 0.00        |
|        |     | RF      | 0.50       | 51.78       | 0.16         | 1.89        |                 |     | RF      | 0.38       | 0.49        | 0.15         | 0.01        |
|        |     | LM_full | 0.01       | 90.65       | 0.27         | 0.21        |                 |     | LM_full | 0.00       | 0.73        | 0.23         | -0.01       |
|        |     | LM_best | 0.01       | 90.60       | 0.27         | 0.00        |                 |     | LM_best | 0.00       | 0.74        | 0.23         | -0.01       |
|        | PS2 | GBM     | 0.47       | 53.38       | 0.16         | -0.85       |                 | PS2 | GBM     | 0.31       | 0.54        | 0.17         | -0.02       |
|        |     | RF      | 0.54       | 49.47       | 0.15         | 0.94        |                 |     | RF      | 0.40       | 0.48        | 0.15         | -0.01       |
|        |     | LM_full | 0.01       | 104.83      | 0.32         | -0.70       |                 |     | LM_full | 0.01       | 0.87        | 0.28         | 0.01        |
|        |     | LM_best | 0.01       | 96.69       | 0.29         | -1.76       |                 |     | LM_best | 0.01       | 0.84        | 0.27         | 0.01        |
|        | PS3 | GBM     | 0.49       | 52.65       | 0.16         | -0.96       |                 | PS3 | GBM     | 0.34       | 0.51        | 0.16         | -0.03       |
|        |     | RF      | 0.55       | 49.25       | 0.15         | 0.34        |                 |     | RF      | 0.41       | 0.47        | 0.15         | 0.00        |
|        |     | LM_full | 0.01       | 110.53      | 0.33         | -4.78       |                 |     | LM_full | 0.00       | 0.91        | 0.29         | 0.03        |
|        |     | LM_best | 0.00       | 95.45       | 0.29         | -1.28       |                 |     | LM_best | 0.00       | 0.80        | 0.26         | 0.00        |
|        | PS4 | GBM     | 0.40       | 53.26       | 0.16         | -0.07       |                 | PS4 | GBM     | 0.05       | 0.57        | 0.18         | 0.00        |
|        |     | RF      | 0.38       | 55.13       | 0.17         | -0.09       |                 |     | RF      | 0.03       | 0.71        | 0.22         | 0.00        |
|        |     | LM_full | 0.00       | 81.99       | 0.25         | 0.09        |                 |     | LM_full | 0.01       | 0.57        | 0.18         | 0.00        |
|        |     | LM_best | 0.00       | 81.99       | 0.25         | 0.09        |                 |     | LM_best | 0.01       | 0.57        | 0.18         | 0.00        |
|        | PS5 | GBM     | 0.59       | 47.77       | 0.14         | 2.07        |                 | PS5 | GBM     | 0.36       | 0.52        | 0.17         | -0.01       |
|        |     | RF      | 0.61       | 46.02       | 0.14         | 1.45        |                 |     | RF      | 0.43       | 0.47        | 0.15         | 0.00        |
|        |     | LM_full | 0.00       | 91.83       | 0.28         | 0.22        |                 |     | LM_full | 0.01       | 0.73        | 0.23         | -0.01       |
|        |     | LM_best | 0.00       | 91.76       | 0.28         | -0.10       |                 |     | LM_best | 0.01       | 0.73        | 0.23         | -0.01       |
|        | PS6 | GBM     | 0.63       | 44.63       | 0.13         | 0.10        |                 | PS6 | GBM     | 0.36       | 0.52        | 0.16         | -0.04       |
|        |     | RF      | 0.67       | 41.87       | 0.13         | 2.19        |                 |     | RF      | 0.43       | 0.46        | 0.15         | -0.01       |
|        |     | LM_full | 0.00       | 109.48      | 0.33         | -2.64       |                 |     | LM_full | 0.00       | 0.89        | 0.28         | 0.02        |
|        |     | LM_best | 0.00       | 98.96       | 0.30         | -1.68       |                 |     | LM_best | 0.01       | 0.82        | 0.26         | -0.01       |
| SEQ    | PS1 | GBM     | 0.30       | 61.31       | 0.18         | 0.16        | SEQ             | PS1 | GBM     | 0.39       | 0.48        | 0.15         | 0.01        |
|        |     | RF      | 0.30       | 61.77       | 0.19         | -0.97       |                 |     | RF      | 0.40       | 0.47        | 0.15         | 0.01        |
|        |     | LM_full | 0.00       | 87.51       | 0.26         | -0.74       |                 |     | LM_full | 0.01       | 0.75        | 0.24         | 0.00        |
|        |     | LM_best | 0.00       | 87.77       | 0.26         | -0.04       |                 |     | LM_best | 0.01       | 0.75        | 0.24         | 0.00        |
|        | PS2 | GBM     | 0.38       | 59.04       | 0.18         | -2.48       |                 | PS2 | GBM     | 0.38       | 0.50        | 0.16         | 0.00        |
|        |     | RF      | 0.40       | 56.69       | 0.17         | 0.10        |                 |     | RF      | 0.43       | 0.46        | 0.15         | 0.00        |
|        |     | LM_full | 0.00       | 92.51       | 0.28         | -0.98       |                 |     | LM_full | 0.01       | 0.85        | 0.27         | -0.01       |
|        |     | LM_best | 0.00       | 90.20       | 0.27         | -0.74       |                 |     | LM_best | 0.00       | 0.79        | 0.25         | 0.01        |
|        | PS3 | GBM     | 0.36       | 58.28       | 0.18         | -0.48       |                 | PS3 | GBM     | 0.42       | 0.48        | 0.15         | 0.00        |
|        |     | RF      | 0.37       | 58.43       | 0.18         | -0.09       |                 |     | RF      | 0.44       | 0.46        | 0.15         | 0.00        |
|        |     | LM_full | 0.01       | 91.25       | 0.27         | -0.27       |                 |     | LM_full | 0.01       | 0.87        | 0.28         | -0.01       |
|        |     | LM_best | 0.00       | 88.77       | 0.27         | 0.09        |                 |     | LM_best | 0.00       | 0.77        | 0.24         | 0.00        |
|        | PS4 | GBM     | 0.44       | 54.83       | 0.16         | 0.19        |                 | PS4 | GBM     | 0.05       | 0.62        | 0.20         | 0.00        |
|        |     | RF      | 0.35       | 60.70       | 0.18         | -0.06       |                 |     | RF      | 0.02       | 0.72        | 0.23         | 0.00        |
|        |     | LM_full | 0.00       | 83.93       | 0.25         | 0.27        |                 |     | LM_full | 0.04       | 0.62        | 0.20         | 0.00        |
|        |     | LM_best | 0.00       | 83.93       | 0.25         | 0.27        |                 |     | LM_best | 0.04       | 0.62        | 0.20         | 0.00        |
|        | PS5 | GBM     | 0.54       | 49.51       | 0.15         | 0.40        |                 | PS5 | GBM     | 0.44       | 0.46        | 0.15         | 0.01        |
|        |     | RF      | 0.56       | 48.20       | 0.14         | -0.09       |                 |     | RF      | 0.43       | 0.46        | 0.15         | 0.00        |
|        |     | LM_full | 0.00       | 91.03       | 0.27         | -0.07       |                 |     | LM_full | 0.01       | 0.75        | 0.24         | 0.00        |
|        |     | LM_best | 0.00       | 91.08       | 0.27         | 0.24        |                 |     | LM_best | 0.01       | 0.76        | 0.24         | -0.01       |
|        | PS6 | GBM     | 0.55       | 50.36       | 0.15         | 0.19        |                 | PS6 | GBM     | 0.43       | 0.48        | 0.15         | -0.01       |
|        |     | RF      | 0.56       | 48.39       | 0.15         | 0.07        |                 |     | RF      | 0.47       | 0.45        | 0.14         | 0.00        |
|        |     | LM_full | 0.01       | 94.06       | 0.28         | 0.17        |                 |     | LM_full | 0.01       | 0.87        | 0.28         | -0.01       |
|        |     | LM_best | 0.00       | 92.57       | 0.28         | 0.91        |                 |     | LM_best | 0.00       | 0.77        | 0.24         | 0.00        |

**Table ST3 (cont.).** Overview of the DM models and cross-validation evaluation metrics for all combinations of sensors (REM, SEQ), predictor sets (PS1: raw reflectance data; PS2: VI; PS3: raw reflectance data + VI; PS4: canopy height; PS5: raw reflectance data + canopy height; PS6: raw reflectance data + VI + canopy height), and ML algorithms (GBM, RF). The unit of  $RMSE_{cv}$  and absolute  $bias_{cv}$  is  $g\ m^{-2}$  for DM and wt.% for N concentration. All metric values of single sensor-predictors-algorithm combinations are averages of the 10 iterations.  $N_{obs, DM} = 82$ ,  $N_{obs, N} = 81$ .

| DM                                       |     |         |            |             |              |             | N concentration                          |     |         |            |             |              |             |
|------------------------------------------|-----|---------|------------|-------------|--------------|-------------|------------------------------------------|-----|---------|------------|-------------|--------------|-------------|
| Sensor                                   | PS  | Model   | $R^2_{cv}$ | $RMSE_{cv}$ | $RRMSE_{cv}$ | $Bias_{cv}$ | Sensor                                   | PS  | Model   | $R^2_{cv}$ | $RMSE_{cv}$ | $RRMSE_{cv}$ | $Bias_{cv}$ |
| <b>REM<br/>without<br/>blue<br/>band</b> | PS1 | GBM     | 0.44       | 54.55       | 0.16         | 0.80        | <b>REM<br/>without<br/>blue<br/>band</b> | PS1 | GBM     | 0.33       | 0.51        | 0.16         | 0.00        |
|                                          |     | RF      | 0.52       | 51.08       | 0.15         | 1.19        |                                          |     | RF      | 0.40       | 0.48        | 0.15         | 0.01        |
|                                          |     | LM_full | 0.01       | 89.96       | 0.27         | 0.11        |                                          |     | LM_full | 0.01       | 0.74        | 0.23         | -0.01       |
|                                          |     | LM_best | 0.01       | 89.67       | 0.27         | 0.28        |                                          |     | LM_best | 0.01       | 0.74        | 0.23         | -0.01       |
|                                          | PS2 | GBM     | 0.49       | 51.99       | 0.16         | -0.65       |                                          | PS2 | GBM     | 0.24       | 0.54        | 0.17         | 0.00        |
|                                          |     | RF      | 0.55       | 48.89       | 0.15         | 0.57        |                                          |     | RF      | 0.38       | 0.49        | 0.16         | 0.00        |
|                                          |     | LM_full | 0.01       | 99.85       | 0.30         | 1.00        |                                          |     | LM_full | 0.01       | 0.84        | 0.27         | 0.02        |
|                                          |     | LM_best | 0.01       | 97.00       | 0.29         | -0.72       |                                          |     | LM_best | 0.01       | 0.79        | 0.25         | 0.00        |
|                                          | PS3 | GBM     | 0.52       | 50.72       | 0.15         | -1.31       |                                          | PS3 | GBM     | 0.31       | 0.51        | 0.16         | -0.01       |
|                                          |     | RF      | 0.56       | 48.65       | 0.15         | 0.33        |                                          |     | RF      | 0.38       | 0.49        | 0.15         | 0.00        |
|                                          |     | LM_full | 0.01       | 101.57      | 0.31         | 0.69        |                                          |     | LM_full | 0.01       | 0.85        | 0.27         | 0.01        |
|                                          |     | LM_best | 0.01       | 94.18       | 0.28         | -1.57       |                                          |     | LM_best | 0.01       | 0.78        | 0.25         | 0.00        |
|                                          | PS4 | GBM     | 0.44       | 54.87       | 0.16         | 0.20        |                                          | PS4 | GBM     | 0.08       | 0.62        | 0.20         | 0.00        |
|                                          |     | RF      | 0.35       | 60.26       | 0.18         | 0.19        |                                          |     | RF      | 0.01       | 0.73        | 0.23         | 0.01        |
|                                          |     | LM_full | 0.00       | 83.93       | 0.25         | 0.27        |                                          |     | LM_full | 0.04       | 0.62        | 0.20         | 0.00        |
|                                          |     | LM_best | 0.00       | 83.93       | 0.25         | 0.27        |                                          |     | LM_best | 0.04       | 0.62        | 0.20         | 0.00        |
|                                          | PS5 | GBM     | 0.58       | 47.89       | 0.14         | 0.90        |                                          | PS5 | GBM     | 0.32       | 0.51        | 0.16         | -0.01       |
|                                          |     | RF      | 0.62       | 45.35       | 0.14         | 0.62        |                                          |     | RF      | 0.44       | 0.46        | 0.15         | 0.00        |
|                                          |     | LM_full | 0.00       | 91.36       | 0.27         | 0.35        |                                          |     | LM_full | 0.01       | 0.74        | 0.23         | -0.01       |
|                                          |     | LM_best | 0.00       | 92.21       | 0.28         | 0.28        |                                          |     | LM_best | 0.01       | 0.74        | 0.23         | -0.02       |
|                                          | PS6 | GBM     | 0.64       | 44.25       | 0.13         | 0.20        |                                          | PS6 | GBM     | 0.33       | 0.51        | 0.16         | -0.01       |
|                                          |     | RF      | 0.68       | 41.35       | 0.12         | 1.52        |                                          |     | RF      | 0.42       | 0.47        | 0.15         | -0.01       |
|                                          |     | LM_full | 0.00       | 101.77      | 0.31         | 2.47        |                                          |     | LM_full | 0.01       | 0.85        | 0.27         | 0.01        |
|                                          |     | LM_best | 0.01       | 96.76       | 0.29         | -2.37       |                                          |     | LM_best | 0.01       | 0.78        | 0.25         | 0.00        |

**Table ST4.** Mean variable importance of all parameter, sensor, predictor set and ML algorithm combinations from the 10 iterations. Unit is mean relative influence (%).

| PS    | DM        |       |           |      |           |      |           |       | N concentration |        |           |      |           |      |           |      |
|-------|-----------|-------|-----------|------|-----------|------|-----------|-------|-----------------|--------|-----------|------|-----------|------|-----------|------|
|       | REM       |       |           |      | SEQ       |      |           |       | REM             |        |           |      | SEQ       |      |           |      |
|       | Predictor | GBM   | Predictor | RF   | Predictor | GBM  | Predictor | RF    | Predictor       | GBM    | Predictor | RF   | Predictor | GBM  | Predictor | RF   |
| PS1   | R_840     | 0.36  | R_840     | 0.38 | R_790     | 0.55 | R_790     | 0.31  | R_560           | 0.28   | R_668     | 0.21 | R_790     | 0.46 | R_735     | 0.30 |
|       | R_475     | 0.19  | R_668     | 0.26 | R_735     | 0.21 | R_660     | 0.28  | R_475           | 0.22   | R_840     | 0.21 | R_550     | 0.18 | R_790     | 0.29 |
|       | R_717     | 0.18  | R_717     | 0.14 | R_550     | 0.12 | R_735     | 0.27  | R_840           | 0.21   | R_475     | 0.21 | R_735     | 0.18 | R_660     | 0.25 |
|       | R_668     | 0.18  | R_475     | 0.11 | R_660     | 0.11 | R_550     | 0.14  | R_668           | 0.17   | R_560     | 0.20 | R_660     | 0.17 | R_550     | 0.16 |
|       | R_560     | 0.09  | R_560     | 0.10 |           |      |           |       | R_717           | 0.11   | R_717     | 0.16 |           |      |           |      |
| PS2   | Datts     | 0.20  | NDVIre    | 0.06 | Datts     | 0.13 | MCARI     | 0.14  | MSR2            | 0.16   | SIPI      | 0.06 | MCARI2    | 0.16 | RRI1      | 0.09 |
|       | MCARI2    | 0.11  | RRI1      | 0.06 | MCARI2    | 0.13 | RARSa     | 0.09  | MCARI2          | 0.14   | RARSa     | 0.05 | MCARI     | 0.12 | NDVIre    | 0.09 |
|       | NDVIre    | 0.06  | Datts     | 0.06 | MCARI     | 0.11 | NDVIre    | 0.09  | SIPI            | 0.09   | MCARI     | 0.05 | Datts     | 0.10 | aDVI      | 0.08 |
|       | RRI1      | 0.06  | MSRre     | 0.05 | NDVIre    | 0.08 | RRI1      | 0.09  | Datts           | 0.08   | RRI1      | 0.05 | NDVIre    | 0.10 | DVI       | 0.06 |
|       | MSRre     | 0.05  | RARSa     | 0.05 | RRI1      | 0.08 | Datts     | 0.09  | MCARI           | 0.06   | NDVIre    | 0.05 | RRI1      | 0.10 | RARSa     | 0.06 |
|       | MCARI     | 0.05  | RRI2      | 0.05 | RRI2      | 0.08 | RRI2      | 0.07  | PSSRc           | 0.04   | MSRre     | 0.05 | RRI2      | 0.07 | MCARI     | 0.06 |
|       | MSR2      | 0.05  | MCARI     | 0.04 | RARSa     | 0.07 | NDVI      | 0.04  | MSRre           | 0.04   | MSR2      | 0.05 | RARSa     | 0.07 | MSR1      | 0.05 |
|       | PSSRc     | 0.04  | GNDVI     | 0.04 | SR        | 0.04 | SR        | 0.04  | GNDVI           | 0.04   | PSSRc     | 0.05 | OSAVI     | 0.04 | NDVI      | 0.05 |
|       | GNDVI     | 0.04  | PSSRc     | 0.04 | MSR1      | 0.04 | MSR1      | 0.04  | RARSa           | 0.04   | RRI2      | 0.04 | MSR1      | 0.03 | SR        | 0.05 |
|       | aDVI      | 0.03  | NDVI      | 0.04 | NDVI      | 0.04 | MSAVI     | 0.04  | ARVI            | 0.04   | GNDVI     | 0.04 | NDVI      | 0.03 | RRI2      | 0.05 |
|       | OSAVI     | 0.03  | MSR1      | 0.04 | aDVI      | 0.04 | OSAVI     | 0.04  | RRI2            | 0.04   | Datts     | 0.04 | SR        | 0.03 | MCARI2    | 0.05 |
|       | MTVI      | 0.03  | SR        | 0.04 | DVI       | 0.04 | DVI       | 0.04  | RRI1            | 0.03   | ARVI      | 0.03 | aDVI      | 0.03 | OSAVI     | 0.05 |
|       | MCARI1    | 0.03  | ARVI      | 0.04 | MTVI      | 0.03 | aDVI      | 0.04  | NDVIre          | 0.03   | aDVI      | 0.03 | DVI       | 0.03 | Datts     | 0.05 |
|       | SIPI      | 0.02  | OSAVI     | 0.04 | MCARI1    | 0.03 | SAVI      | 0.03  | OSAVI           | 0.02   | MSR1      | 0.03 | MSAVI     | 0.02 | MSAVI     | 0.04 |
|       | DVI       | 0.02  | SIPI      | 0.03 | OSAVI     | 0.02 | MCARI1    | 0.03  | SARVI           | 0.02   | SR        | 0.03 | MTVI      | 0.02 | MCARI1    | 0.04 |
|       | SARVI     | 0.02  | MCARI2    | 0.03 | MSAVI     | 0.02 | MTVI      | 0.03  | MCARI1          | 0.01   | NDVI      | 0.03 | MCARI1    | 0.02 | MTVI      | 0.04 |
|       | MSAVI     | 0.02  | MTVI      | 0.03 | SAVI      | 0.02 | RDVI      | 0.03  | MTVI            | 0.01   | DVI       | 0.03 | RDVI      | 0.02 | SAVI      | 0.04 |
|       | EVI       | 0.02  | MCARI1    | 0.03 | RDVI      | 0.01 | MCARI2    | 0.02  | SR              | 0.01   | MCARI1    | 0.03 | SAVI      | 0.02 | RDVI      | 0.04 |
|       | RDVI      | 0.01  | aDVI      | 0.03 |           |      |           |       | DVI             | 0.01   | OSAVI     | 0.03 |           |      |           |      |
|       | SAVI      | 0.01  | SARVI     | 0.03 |           |      |           |       | NDVI            | 0.01   | MTVI      | 0.03 |           |      |           |      |
|       | ARVI      | 0.01  | RDVI      | 0.03 |           |      |           |       | aDVI            | 0.01   | EVI       | 0.03 |           |      |           |      |
|       | RARSa     | 0.01  | DVI       | 0.03 |           |      |           |       | MSR1            | 0.01   | MSAVI     | 0.03 |           |      |           |      |
|       | RRI2      | 0.01  | MSAVI     | 0.03 |           |      |           |       | EVI             | 0.01   | RDVI      | 0.03 |           |      |           |      |
|       | SR        | 0.01  | SAVI      | 0.03 |           |      |           |       | MSAVI           | 0.01   | SARVI     | 0.03 |           |      |           |      |
|       | NDVI      | 0.01  | EVI       | 0.03 |           |      |           |       | SAVI            | 0.01   | SAVI      | 0.03 |           |      |           |      |
| MSR1  | 0.01      | MSR2  | 0.02      |      |           |      |           | RDVI  | 0.01            | MCARI2 | 0.03      |      |           |      |           |      |
| PS3   | Datts     | 0.18  | NDVIre    | 0.06 | Datts     | 0.14 | MCARI     | 0.11  | R_560           | 0.11   | R_475     | 0.07 | MCARI2    | 0.12 | RRI1      | 0.08 |
|       | MCARI2    | 0.10  | RRI1      | 0.06 | R_735     | 0.11 | RRI1      | 0.08  | MCARI2          | 0.11   | SIPI      | 0.05 | RRI1      | 0.10 | NDVIre    | 0.08 |
|       | NDVIre    | 0.06  | Datts     | 0.06 | NDVIre    | 0.10 | NDVIre    | 0.08  | MSR2            | 0.11   | MCARI     | 0.04 | NDVIre    | 0.10 | R_735     | 0.07 |
|       | RRI1      | 0.06  | RARSa     | 0.05 | RRI1      | 0.10 | Datts     | 0.08  | R_475           | 0.08   | RARSa     | 0.04 | R_550     | 0.08 | aDVI      | 0.06 |
|       | MCARI     | 0.05  | MSRre     | 0.05 | MCARI     | 0.07 | RARSa     | 0.07  | Datts           | 0.07   | MSR2      | 0.04 | MCARI     | 0.08 | MCARI     | 0.05 |
|       | MSRre     | 0.05  | RRI2      | 0.05 | R_660     | 0.07 | R_735     | 0.07  | R_668           | 0.05   | NDVIre    | 0.04 | R_735     | 0.08 | DVI       | 0.05 |
|       | MSR2      | 0.05  | GNDVI     | 0.04 | R_550     | 0.07 | RRI2      | 0.06  | R_717           | 0.05   | RRI1      | 0.04 | R_660     | 0.06 | RARSa     | 0.05 |
|       | R_475     | 0.05  | R_668     | 0.04 | R_790     | 0.05 | R_790     | 0.04  | SIPI            | 0.05   | R_668     | 0.04 | Datts     | 0.05 | R_790     | 0.05 |
|       | R_717     | 0.04  | PSSRc     | 0.04 | MCARI2    | 0.05 | MSAVI     | 0.04  | MCARI           | 0.04   | MSRre     | 0.04 | RARSa     | 0.04 | R_550     | 0.04 |
|       | GNDVI     | 0.04  | MCARI     | 0.04 | RARSa     | 0.03 | OSAVI     | 0.04  | PSSRc           | 0.03   | PSSRc     | 0.04 | RRI2      | 0.04 | RRI2      | 0.04 |
|       | R_840     | 0.04  | NDVI      | 0.03 | RRI2      | 0.03 | SR        | 0.04  | MSRre           | 0.03   | RRI2      | 0.03 | OSAVI     | 0.04 | SR        | 0.04 |
|       | PSSRc     | 0.04  | MSR1      | 0.03 | aDVI      | 0.02 | MSR1      | 0.03  | GNDVI           | 0.03   | Datts     | 0.03 | NDVI      | 0.03 | MSR1      | 0.04 |
|       | R_668     | 0.03  | SR        | 0.03 | DVI       | 0.02 | NDVI      | 0.03  | ARVI            | 0.02   | R_560     | 0.03 | MSR1      | 0.03 | NDVI      | 0.04 |
|       | OSAVI     | 0.03  | ARVI      | 0.03 | MTVI      | 0.02 | DVI       | 0.03  | R_840           | 0.02   | GNDVI     | 0.03 | SR        | 0.03 | MCARI2    | 0.04 |
|       | aDVI      | 0.02  | OSAVI     | 0.03 | MCARI1    | 0.02 | aDVI      | 0.03  | RRI2            | 0.02   | R_840     | 0.03 | R_790     | 0.03 | OSAVI     | 0.04 |
|       | SARVI     | 0.02  | SIPI      | 0.03 | SR        | 0.02 | SAVI      | 0.03  | RARSa           | 0.02   | SR        | 0.03 | aDVI      | 0.02 | Datts     | 0.04 |
|       | SIPI      | 0.02  | R_717     | 0.03 | NDVI      | 0.02 | MTVI      | 0.03  | RRI1            | 0.02   | MSR1      | 0.03 | MSAVI     | 0.02 | R_660     | 0.04 |
|       | MCARI1    | 0.01  | R_475     | 0.02 | MSR1      | 0.02 | MCARI1    | 0.03  | NDVIre          | 0.02   | NDVI      | 0.03 | SAVI      | 0.01 | MSAVI     | 0.03 |
|       | MTVI      | 0.01  | MCARI2    | 0.02 | MSAVI     | 0.01 | RDVI      | 0.03  | SARVI           | 0.01   | aDVI      | 0.03 | DVI       | 0.01 | SAVI      | 0.03 |
|       | MSAVI     | 0.01  | R_560     | 0.02 | SAVI      | 0.01 | MCARI2    | 0.02  | OSAVI           | 0.01   | ARVI      | 0.03 | RDVI      | 0.01 | MTVI      | 0.03 |
|       | DVI       | 0.01  | MCARI1    | 0.02 | RDVI      | 0.01 | R_660     | 0.02  | aDVI            | 0.01   | DVI       | 0.03 | MTVI      | 0.01 | MCARI1    | 0.03 |
|       | EVI       | 0.01  | MTVI      | 0.02 | OSAVI     | 0.01 | R_550     | 0.01  | MCARI1          | 0.01   | OSAVI     | 0.03 | MCARI1    | 0.01 | RDVI      | 0.03 |
|       | R_560     | 0.01  | MSR2      | 0.02 |           |      |           |       | MTVI            | 0.01   | MTVI      | 0.02 |           |      |           |      |
|       | ARVI      | 0.01  | R_840     | 0.02 |           |      |           |       | DVI             | 0.01   | MCARI1    | 0.02 |           |      |           |      |
|       | RDVI      | 0.01  | aDVI      | 0.02 |           |      |           |       | NDVI            | 0.01   | EVI       | 0.02 |           |      |           |      |
| SAVI  | 0.01      | SARVI | 0.02      |      |           |      |           | SR    | 0.01            | MSAVI  | 0.02      |      |           |      |           |      |
| SR    | 0.01      | RDVI  | 0.02      |      |           |      |           | MSR1  | 0.01            | SARVI  | 0.02      |      |           |      |           |      |
| MSR1  | 0.01      | EVI   | 0.02      |      |           |      |           | EVI   | 0.01            | RDVI   | 0.02      |      |           |      |           |      |
| NDVI  | 0.01      | DVI   | 0.02      |      |           |      |           | MSAVI | 0.01            | SAVI   | 0.02      |      |           |      |           |      |
| RARSa | 0.01      | MSAVI | 0.02      |      |           |      |           | SAVI  | 0               | R_717  | 0.02      |      |           |      |           |      |
| RRI2  | 0.01      | SAVI  | 0.02      |      |           |      |           | RDVI  | 0               | MCARI2 | 0.02      |      |           |      |           |      |

**Table ST4 (continued).** Mean variable importance of all parameter, sensor, predictor set and ML algorithm combinations from the 10 iterations. Unit is mean relative influence (%).

| PS        | DM     |           |        |           |        |           |        |           | N concentration |           |        |           |        |           |        |      |
|-----------|--------|-----------|--------|-----------|--------|-----------|--------|-----------|-----------------|-----------|--------|-----------|--------|-----------|--------|------|
|           | REM    |           |        |           | SEQ    |           |        |           | REM             |           |        |           | SEQ    |           |        |      |
| Predictor | GBM    | Predictor | RF     | Predictor | GBM    | Predictor | RF     | Predictor | GBM             | Predictor | RF     | Predictor | GBM    | Predictor | RF     |      |
| PS4       | CH     | 1.00      | CH     | 1.00      | CH     | 1.00      | CH     | 1.00      | CH              | 1.00      | CH     | 1.00      | CH     | 1.00      | CH     | 1.00 |
| PS5       | CH     | 0.35      | CH     | 0.30      | CH     | 0.52      | CH     | 0.37      | R_560           | 0.2       | R_475  | 0.22      | R_790  | 0.37      | R_790  | 0.26 |
|           | R_840  | 0.17      | R_668  | 0.20      | R_790  | 0.24      | R_790  | 0.19      | R_840           | 0.18      | R_668  | 0.20      | CH     | 0.2       | R_735  | 0.26 |
|           | R_475  | 0.14      | R_717  | 0.15      | R_735  | 0.10      | R_735  | 0.16      | R_475           | 0.18      | R_840  | 0.19      | R_550  | 0.15      | R_660  | 0.22 |
|           | R_668  | 0.13      | R_840  | 0.15      | R_550  | 0.08      | R_550  | 0.15      | CH              | 0.17      | R_560  | 0.17      | R_735  | 0.15      | R_550  | 0.14 |
|           | R_717  | 0.13      | R_475  | 0.11      | R_660  | 0.07      | R_660  | 0.14      | R_668           | 0.15      | R_717  | 0.12      | R_660  | 0.14      | CH     | 0.13 |
|           | R_560  | 0.09      | R_560  | 0.10      |        |           |        |           | R_717           | 0.12      | CH     | 0.10      |        |           |        |      |
| PS6       | CH     | 0.29      | CH     | 0.14      | CH     | 0.47      | CH     | 0.2       | MSR2            | 0.10      | R_475  | 0.09      | CH     | 0.12      | NDVIre | 0.08 |
|           | Datts  | 0.17      | Datts  | 0.08      | Datts  | 0.08      | MCARI  | 0.07      | R_560           | 0.10      | MCARI  | 0.05      | MCARI2 | 0.11      | RRI1   | 0.08 |
|           | MCARI2 | 0.08      | RARSa  | 0.06      | RRI1   | 0.07      | RARSa  | 0.06      | MCARI2          | 0.10      | CH     | 0.05      | NDVIre | 0.08      | CH     | 0.08 |
|           | NDVIre | 0.05      | RRI1   | 0.05      | NDVIre | 0.07      | RRI1   | 0.05      | CH              | 0.08      | SIPI   | 0.05      | RRI1   | 0.08      | R_735  | 0.06 |
|           | RRI1   | 0.05      | NDVIre | 0.05      | R_735  | 0.05      | NDVIre | 0.05      | R_475           | 0.08      | MSR2   | 0.05      | R_550  | 0.07      | aDVI   | 0.06 |
|           | MSRre  | 0.04      | RRI2   | 0.05      | R_550  | 0.04      | R_550  | 0.05      | Datts           | 0.07      | RARSa  | 0.04      | Datts  | 0.07      | DVI    | 0.05 |
|           | MSR2   | 0.03      | MSRre  | 0.04      | R_790  | 0.03      | RRI2   | 0.05      | R_717           | 0.05      | MSRre  | 0.04      | R_735  | 0.07      | R_790  | 0.05 |
|           | MCARI  | 0.03      | R_668  | 0.04      | MCARI  | 0.02      | Datts  | 0.05      | SIPI            | 0.04      | RRI1   | 0.04      | MCARI  | 0.06      | RARSa  | 0.04 |
|           | R_475  | 0.03      | MCARI  | 0.04      | R_660  | 0.02      | R_735  | 0.04      | MCARI           | 0.04      | NDVIre | 0.04      | R_660  | 0.06      | MCARI  | 0.04 |
|           | PSSRc  | 0.02      | GNDVI  | 0.03      | MTVI   | 0.02      | OSAVI  | 0.03      | R_668           | 0.04      | R_668  | 0.04      | RARSa  | 0.04      | R_550  | 0.04 |
|           | R_717  | 0.02      | PSSRc  | 0.03      | MCARI1 | 0.02      | MSAVI  | 0.03      | MSRre           | 0.03      | Datts  | 0.04      | RRI2   | 0.04      | OSAVI  | 0.04 |
|           | R_840  | 0.02      | ARVI   | 0.03      | RARSa  | 0.01      | R_790  | 0.03      | PSSRc           | 0.03      | R_560  | 0.04      | OSAVI  | 0.03      | RRI2   | 0.04 |
|           | R_668  | 0.02      | MCARI2 | 0.03      | aDVI   | 0.01      | MCARI1 | 0.03      | GNDVI           | 0.03      | PSSRc  | 0.03      | MSR1   | 0.02      | MCARI2 | 0.03 |
|           | GNDVI  | 0.02      | SIPI   | 0.03      | DVI    | 0.01      | MTVI   | 0.03      | R_840           | 0.02      | RRI2   | 0.03      | SR     | 0.02      | Datts  | 0.03 |
|           | OSAVI  | 0.02      | R_717  | 0.03      | RRI2   | 0.01      | DVI    | 0.03      | RRI1            | 0.02      | GNDVI  | 0.03      | R_790  | 0.02      | MSAVI  | 0.03 |
|           | SIPI   | 0.02      | MSR1   | 0.02      | MSAVI  | 0.01      | aDVI   | 0.03      | ARVI            | 0.02      | R_840  | 0.03      | NDVI   | 0.02      | SAVI   | 0.03 |
|           | aDVI   | 0.01      | NDVI   | 0.02      | MCARI2 | 0.01      | SAVI   | 0.03      | NDVIre          | 0.02      | ARVI   | 0.02      | aDVI   | 0.02      | MSR1   | 0.03 |
|           | ARVI   | 0.01      | SR     | 0.02      | OSAVI  | 0.01      | MSR1   | 0.02      | RRI2            | 0.02      | NDVI   | 0.02      | MSAVI  | 0.02      | NDVI   | 0.03 |
|           | SARVI  | 0.01      | R_475  | 0.02      | RDVI   | 0.01      | SR     | 0.02      | RARSa           | 0.02      | SR     | 0.02      | DVI    | 0.01      | RDVI   | 0.03 |
|           | R_560  | 0.01      | R_560  | 0.02      | SAVI   | 0.01      | RDVI   | 0.02      | SARVI           | 0.01      | MSR1   | 0.02      | MCARI1 | 0.01      | SR     | 0.03 |
|           | MSAVI  | 0.01      | MSR2   | 0.02      | SR     | 0.00      | NDVI   | 0.02      | OSAVI           | 0.01      | aDVI   | 0.02      | SAVI   | 0.01      | MTVI   | 0.03 |
|           | DVI    | 0.01      | OSAVI  | 0.02      | MSR1   | 0.00      | R_660  | 0.02      | MCARI1          | 0.01      | DVI    | 0.02      | MTVI   | 0.01      | MCARI1 | 0.03 |
|           | EVI    | 0.01      | SARVI  | 0.02      | NDVI   | 0.00      | MCARI2 | 0.02      | DVI             | 0.01      | MCARI2 | 0.02      | RDVI   | 0.01      | R_660  | 0.03 |
|           | MCARI1 | 0.01      | MCARI1 | 0.01      |        |           |        |           | MTVI            | 0.01      | OSAVI  | 0.02      |        |           |        |      |
|           | MTVI   | 0.01      | MTVI   | 0.01      |        |           |        |           | aDVI            | 0.01      | MTVI   | 0.02      |        |           |        |      |
|           | RRI2   | 0.01      | MSAVI  | 0.01      |        |           |        |           | MSR1            | 0.01      | MCARI1 | 0.02      |        |           |        |      |
|           | RARSa  | 0.01      | RDVI   | 0.01      |        |           |        |           | NDVI            | 0.01      | EVI    | 0.02      |        |           |        |      |
|           | RDVI   | 0.01      | aDVI   | 0.01      |        |           |        |           | SR              | 0.01      | SAVI   | 0.02      |        |           |        |      |
|           | NDVI   | 0.01      | EVI    | 0.01      |        |           |        |           | EVI             | 0.01      | MSAVI  | 0.02      |        |           |        |      |
|           | SR     | 0.01      | SAVI   | 0.01      |        |           |        |           | MSAVI           | 0.00      | R_717  | 0.02      |        |           |        |      |
| MSR1      | 0.00   | R_840     | 0.01   |           |        |           |        | SAVI      | 0.00            | SARVI     | 0.02   |           |        |           |        |      |
| SAVI      | 0.00   | DVI       | 0.01   |           |        |           |        | RDVI      | 0.00            | RDVI      | 0.02   |           |        |           |        |      |

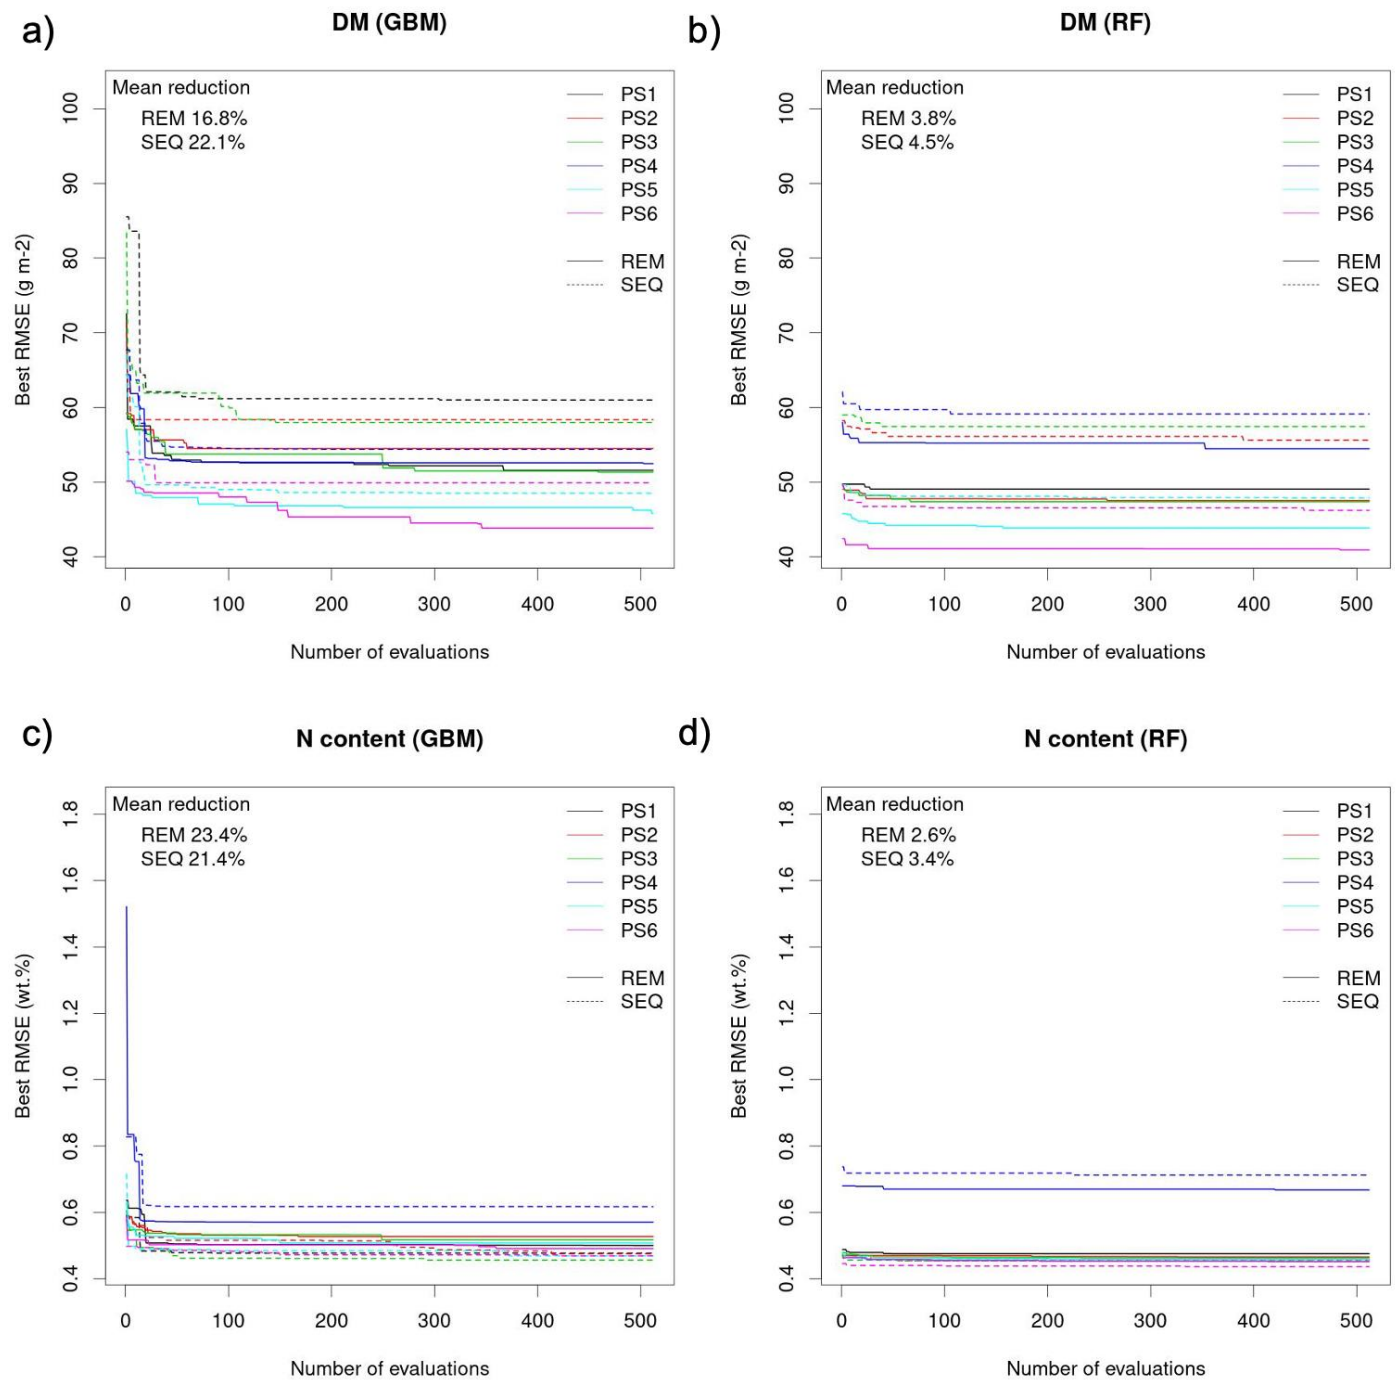

**Figure SF1.** Changes of best error (i.e. lowest error achieved until  $i_{th}$  iteration) in parameter calibration for a) DM with GBM, b) DM with RF, c) N concentration with GBM, d) N concentration with RF algorithm. The overall improvement (i.e. mean of mean reductions) is 11.0%.



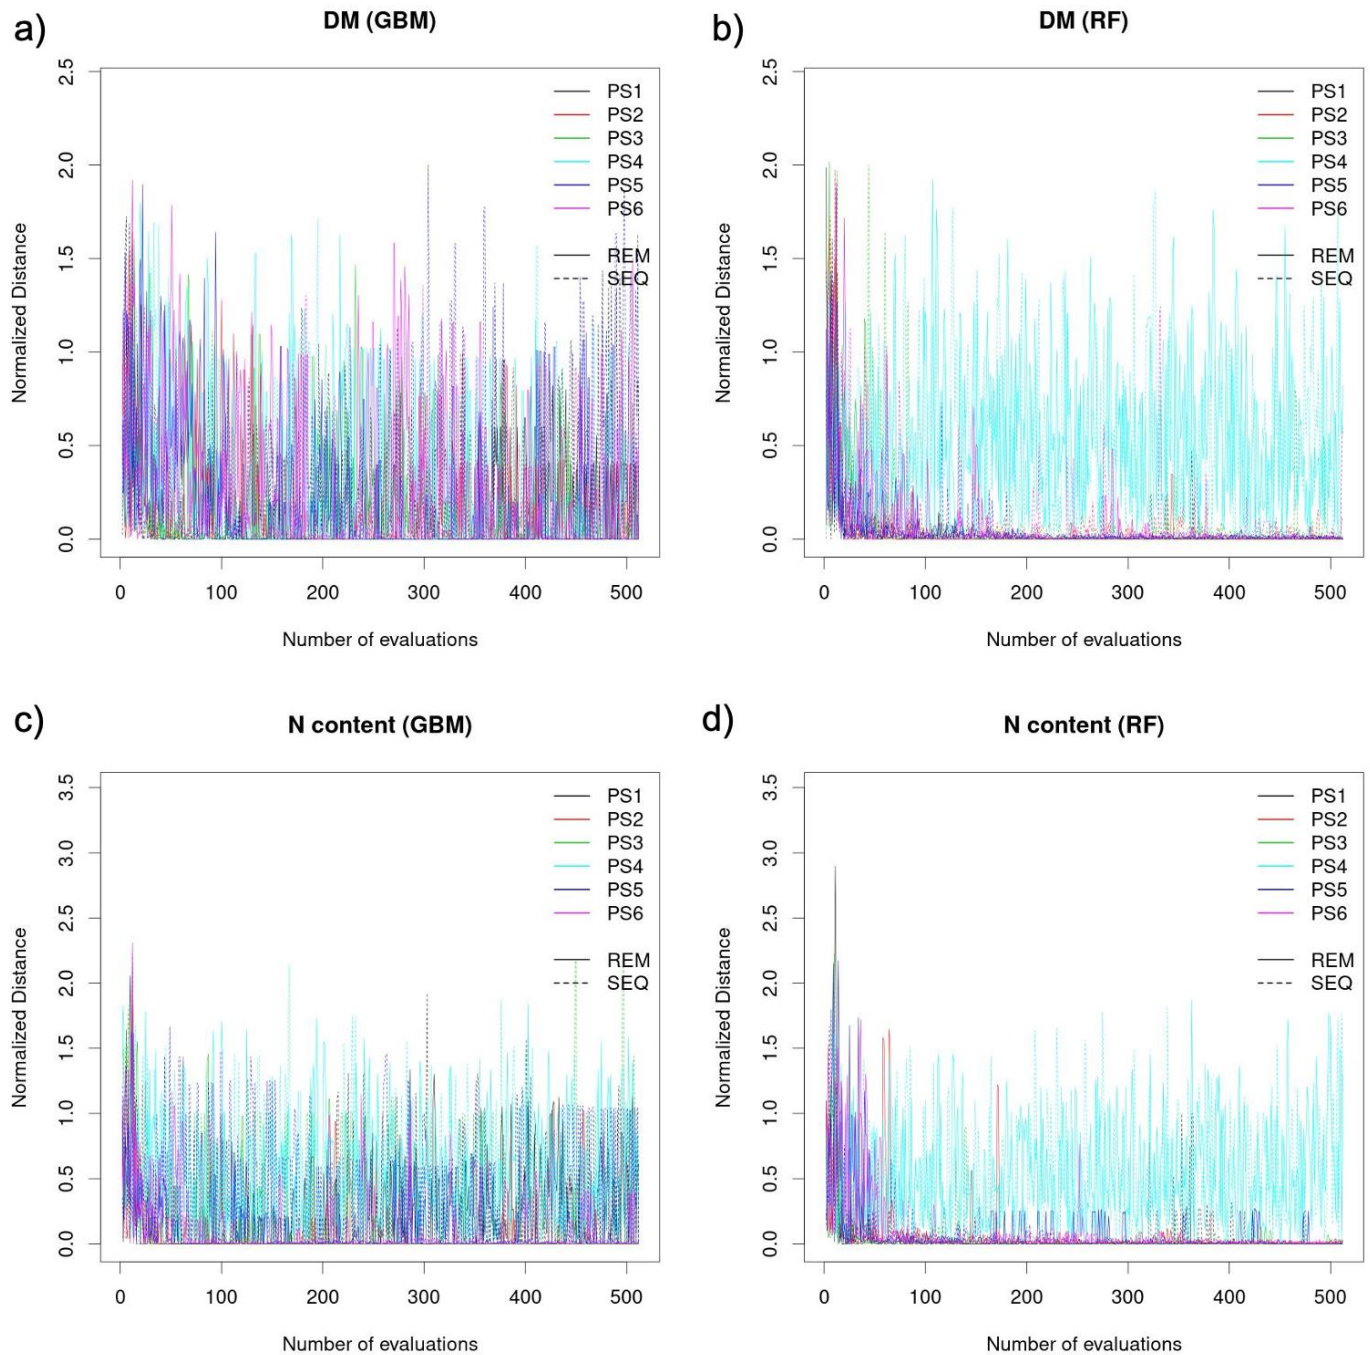

**Figure SF2.** Parameter convergence diagnosis by normalized distance for a) DM with GBM, b) DM with RF, c) N concentration with GBM, d) N concentration with RF algorithm. The metric is defined by distance between two consecutive parameter proposals after normalization quantifying how similar proposals are at each time step.

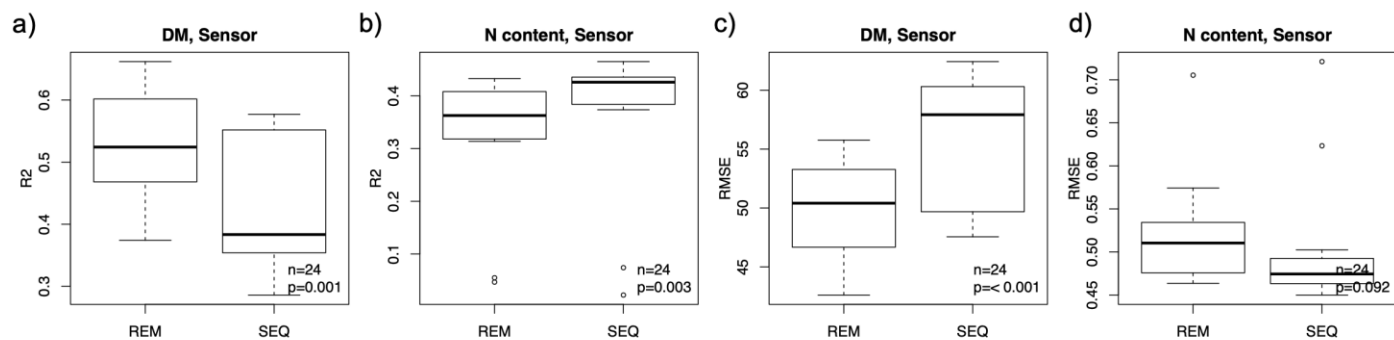

**Figure SF3.** Comparison of model quality parameters between REM and SEQ data: a)  $R^2$  of DM models, b)  $R^2$  of N concentration models, c) RMSE of DM models, d) RMSE of N concentration models. The boxplots were calculated from the model performance metrics of all ML algorithm and predictor set combinations of the respective sensor. The p-values are from Wilcoxon signed rank test.

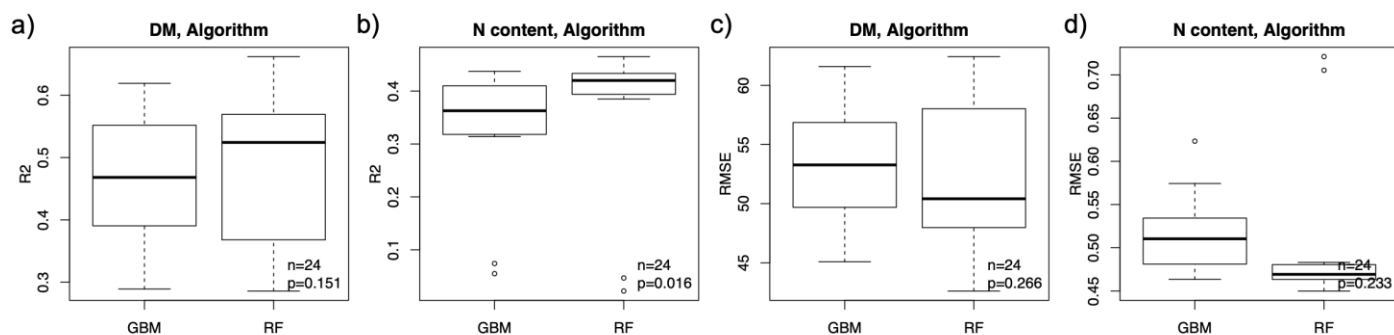

**Figure SF4.** Comparison of model quality parameters between the ML algorithms GBM and RF: a)  $R^2$  of DM models, b)  $R^2$  of N concentration models, c) RMSE of DM models, d) RMSE of N concentration models. The boxplots were calculated from the model performance metrics of all sensor and predictor set combinations of the respective ML algorithm. The p-values are from Wilcoxon signed rank test.

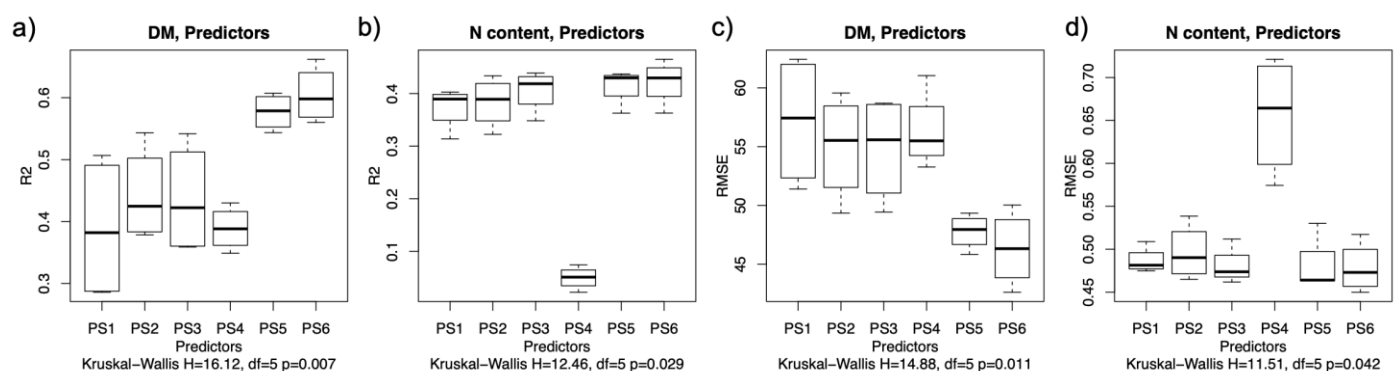

**Figure SF5.** Comparison of model quality parameters between different predictor sets: a)  $R^2$  of DM models, b)  $R^2$  of N concentration models, c) RMSE of DM models, d) RMSE of N concentration models. The boxplots were calculated from the model performance metrics of all sensor and ML algorithm combinations of the respective predictor set. The p-values are from Kruskal-Wallis rank sum. Predictor sets PS1: raw reflectance data; PS2: raw reflectance data + canopy height; PS3: raw reflectance data + VI; PS4: raw reflectance data + VI + canopy height; PS5: canopy height; PS6: VI) test.

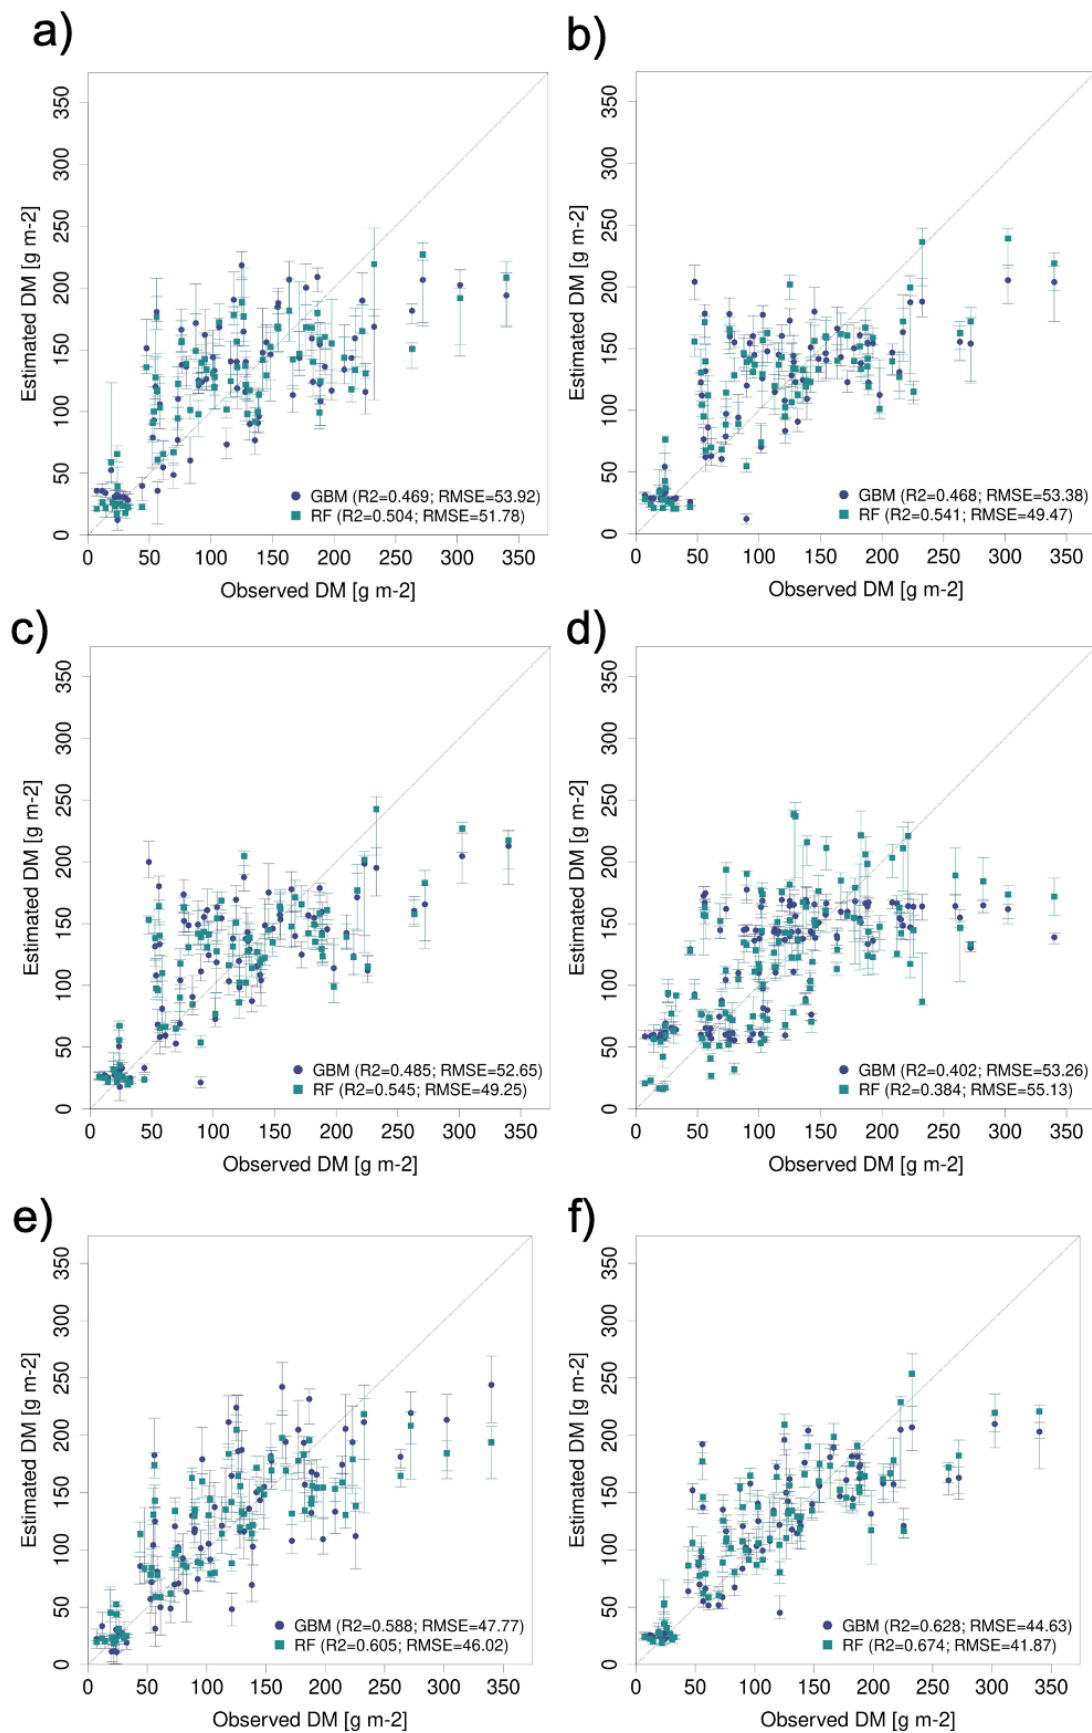

**Figure SF6-1.** Prediction plots of DM for cross-validation sites (FE + RB) with REM data: a) for predictor set PS1 (raw reflectance data), b) for PS2 (VI), c) for PS3 (raw reflectance data + VI), d) for PS4 (canopy height), e) for PS5 (raw reflectance data + canopy height), f) for PS6 (raw reflectance data + VI + canopy height). The error bars reflect 90% prediction intervals, defined by 5<sup>th</sup> and 95<sup>th</sup> percentiles of the 10 iterations.

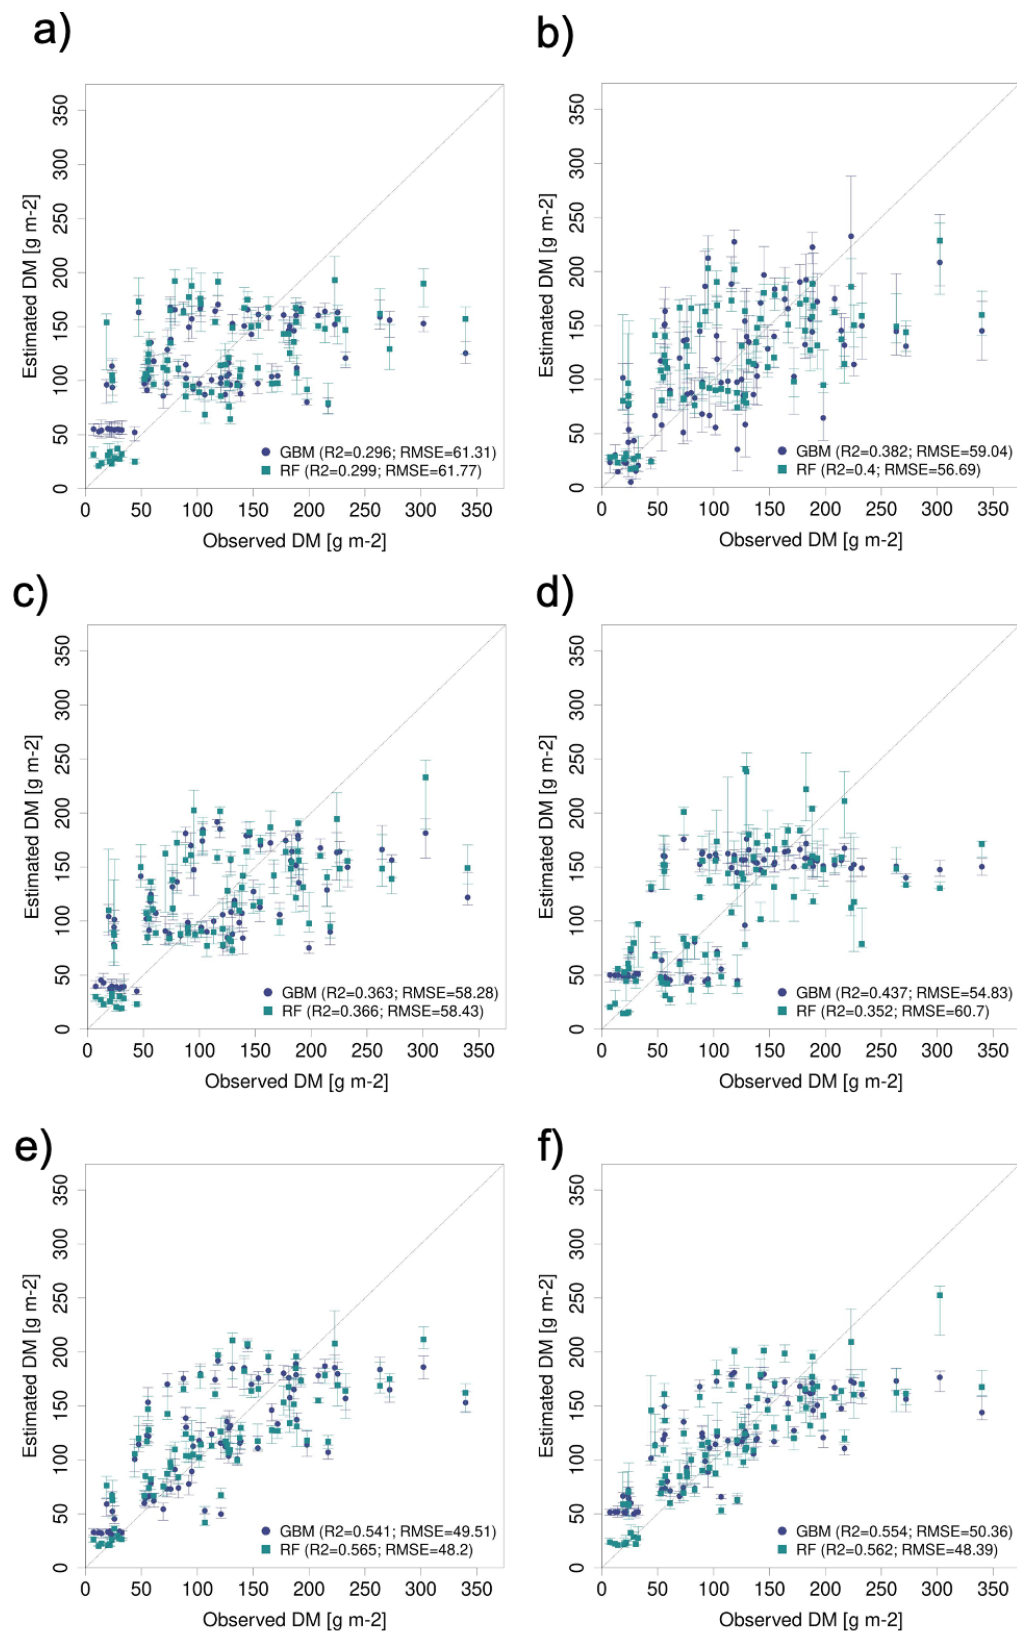

**Fig. SF6-2** Prediction plots of DM for cross-validation sites (FE + RB) with SEQ data: a) for predictor set PS1 (raw reflectance data), b) for PS2 (VI), c) for PS3 (raw reflectance data + VI), d) for PS4 (canopy height), e) for PS5 (raw reflectance data + canopy height), f) for PS6 (raw reflectance data + VI + canopy height). The error bars reflect 90% prediction intervals, defined by 5<sup>th</sup> and 95<sup>th</sup> percentiles of the 10 iterations.

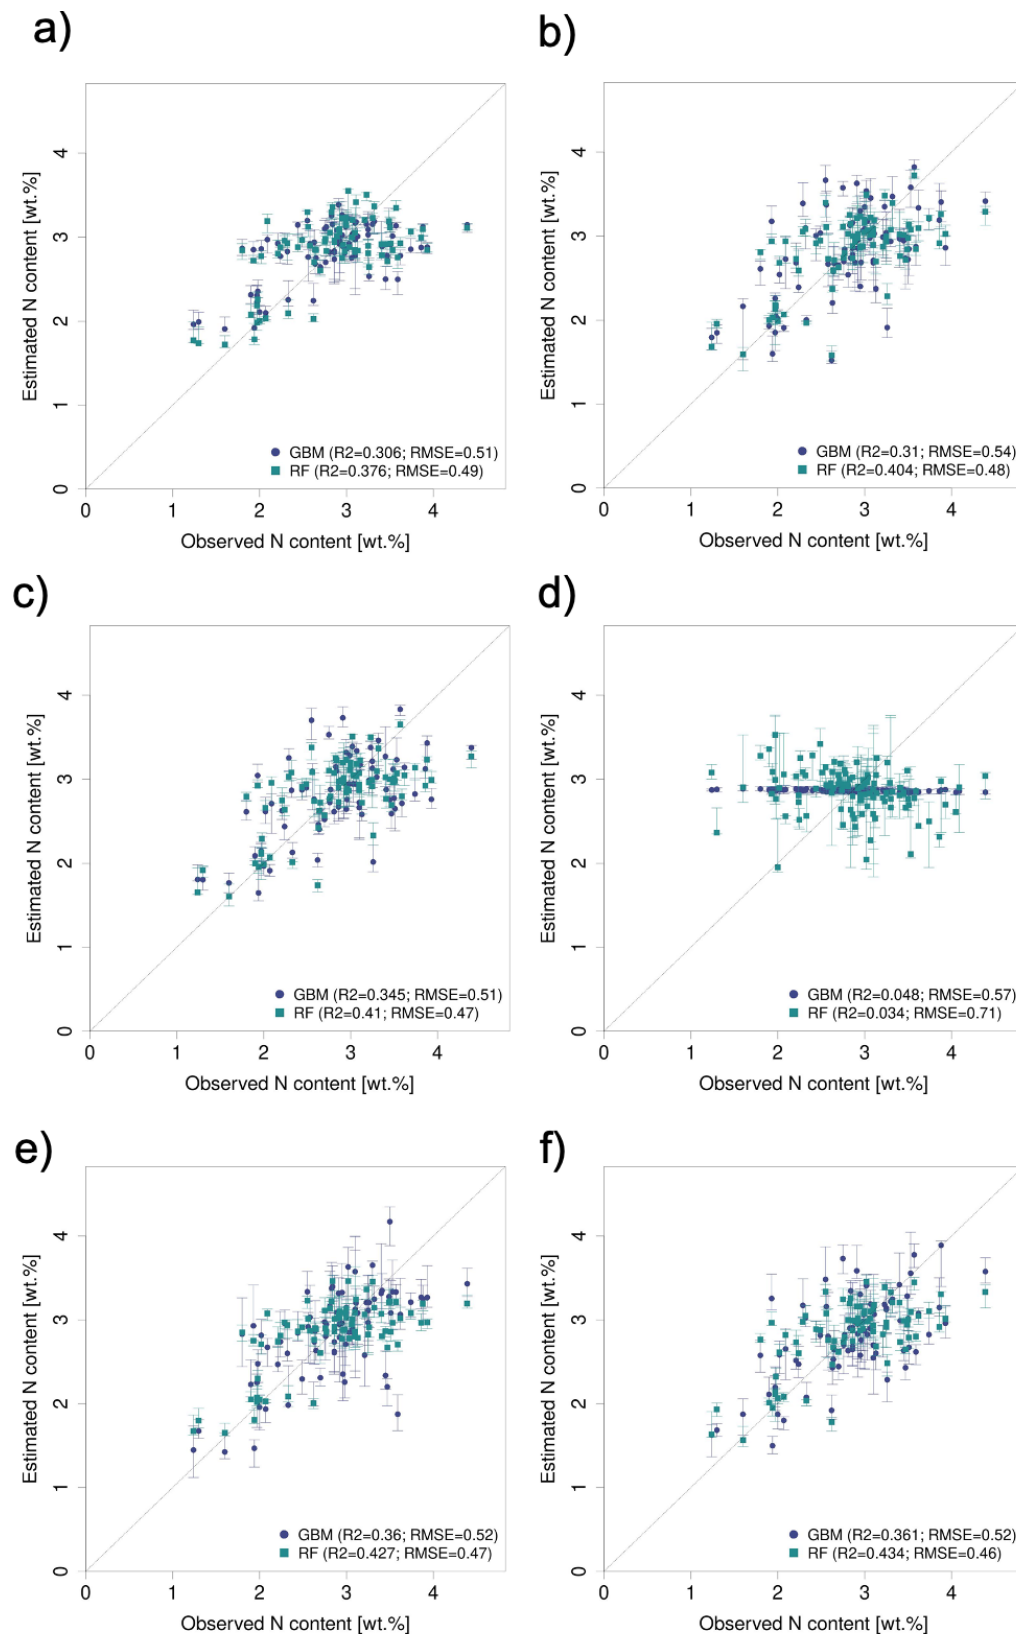

**Figure SF7-1.** Prediction plots of N concentration for cross-validation sites (FE + RB) with REM data: a) for predictor set PS1 (raw reflectance data), b) for PS2 (VI), c) for PS3 (raw reflectance data + VI), d) for PS4 (canopy height), e) for PS5 (raw reflectance data + canopy height), f) for PS6 (raw reflectance data + VI + canopy height). The error bars reflect 90% prediction intervals, defined by 5<sup>th</sup> and 95<sup>th</sup> percentiles of the 10 iterations.



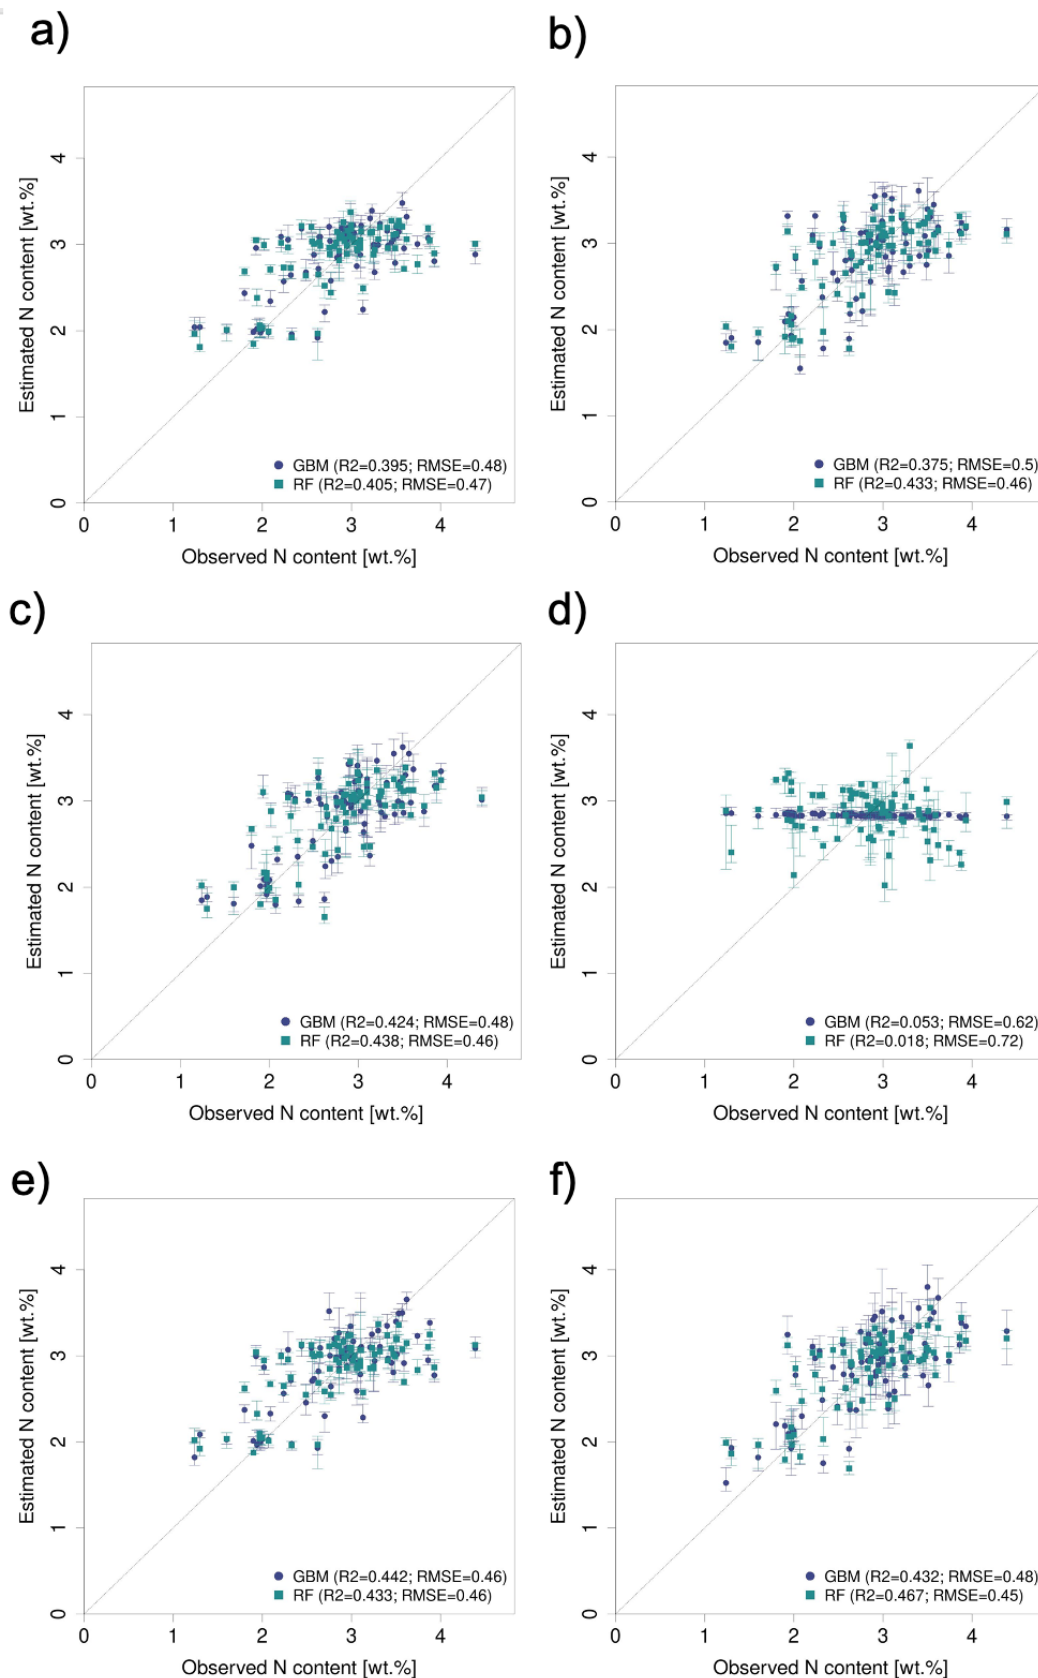

**Fig SF7-2.** Prediction plots of N concentration for cross-validation sites (FE + RB) with SEQ data: a) for predictor set PS1 (raw reflectance data), b) for PS2 (VI), c) for PS3 (raw reflectance data + VI), d) for PS4 (canopy height), e) for PS5 (raw reflectance data + canopy height), f) for PS6 (raw reflectance data + VI + canopy height). The error bars reflect 90% prediction intervals, defined by 5<sup>th</sup> and 95<sup>th</sup> percentiles of the 10 iterations.

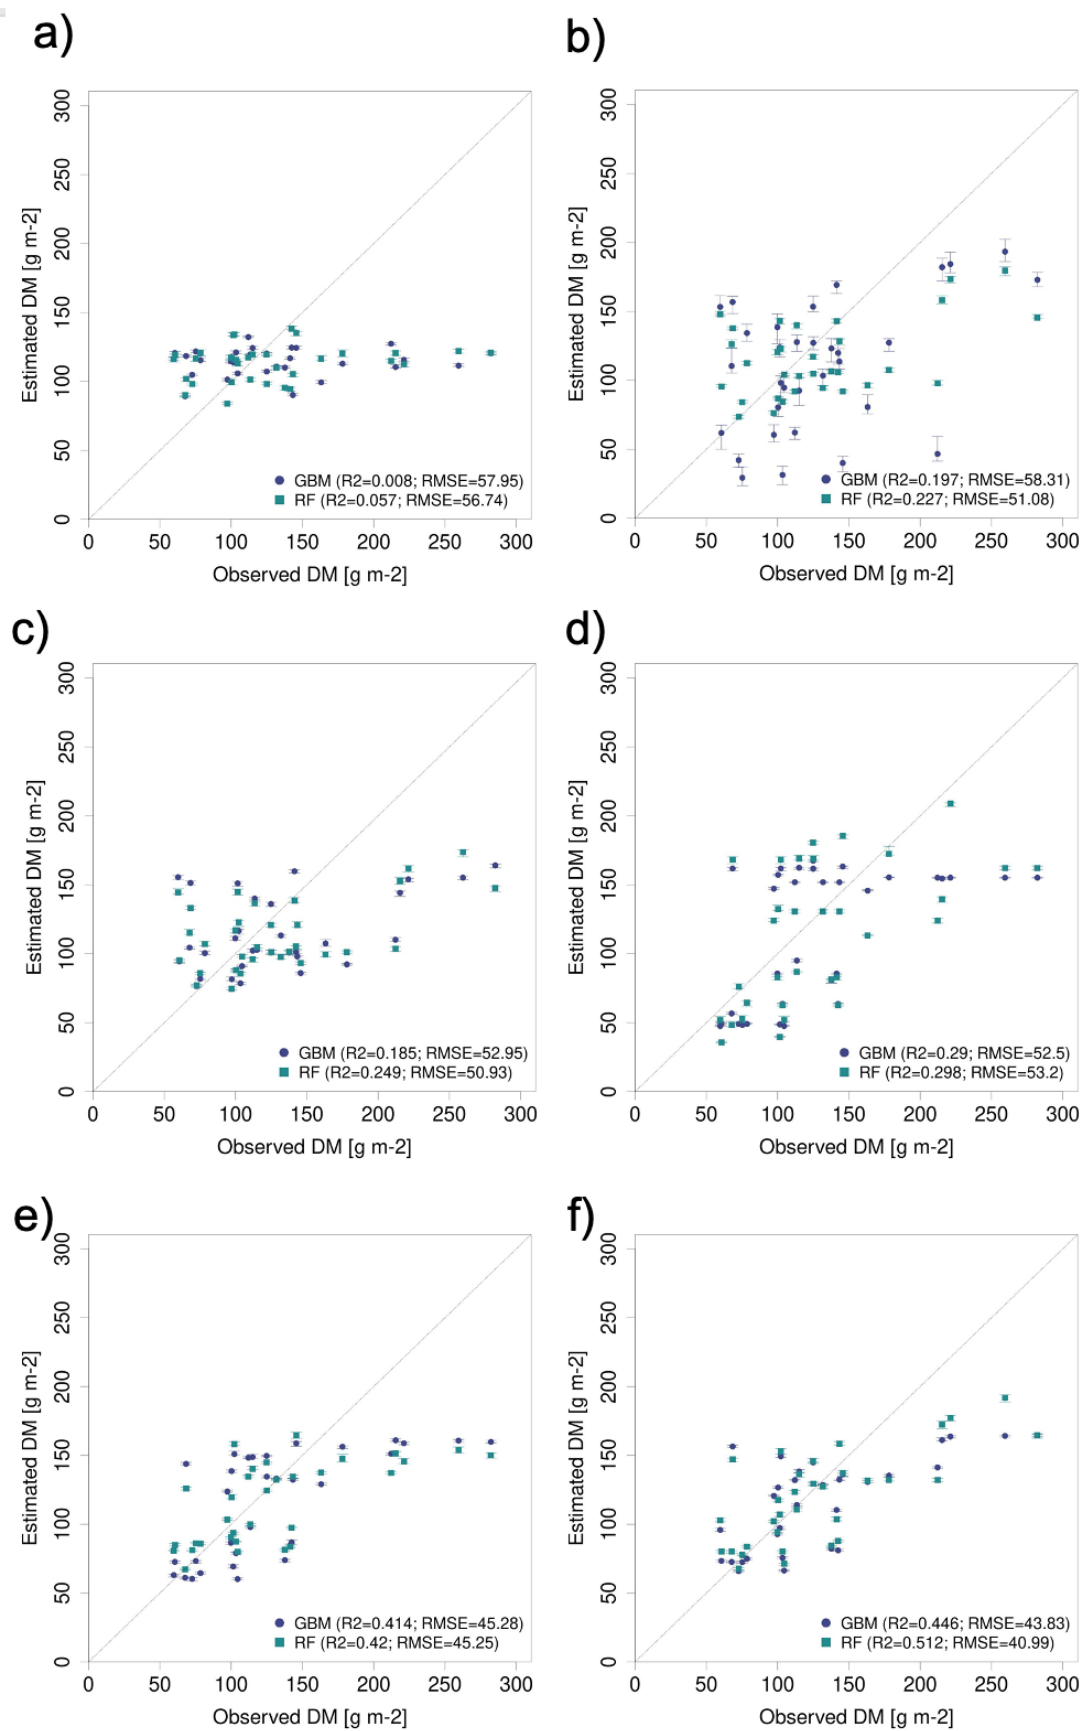

**Figure SF8.** Prediction plots of DM for validation site (EL) with SEQ data: a) for predictor set PS1 (raw reflectance data), b) for PS2 (VI), c) for PS3 (raw reflectance data + VI), d) for PS4 (canopy height), e) for PS5 (raw reflectance data + canopy height), f) for PS6 (raw reflectance data + VI + canopy height). The error bars reflect 90% prediction intervals, defined by 5<sup>th</sup> and 95<sup>th</sup> percentiles of the 10 iterations.

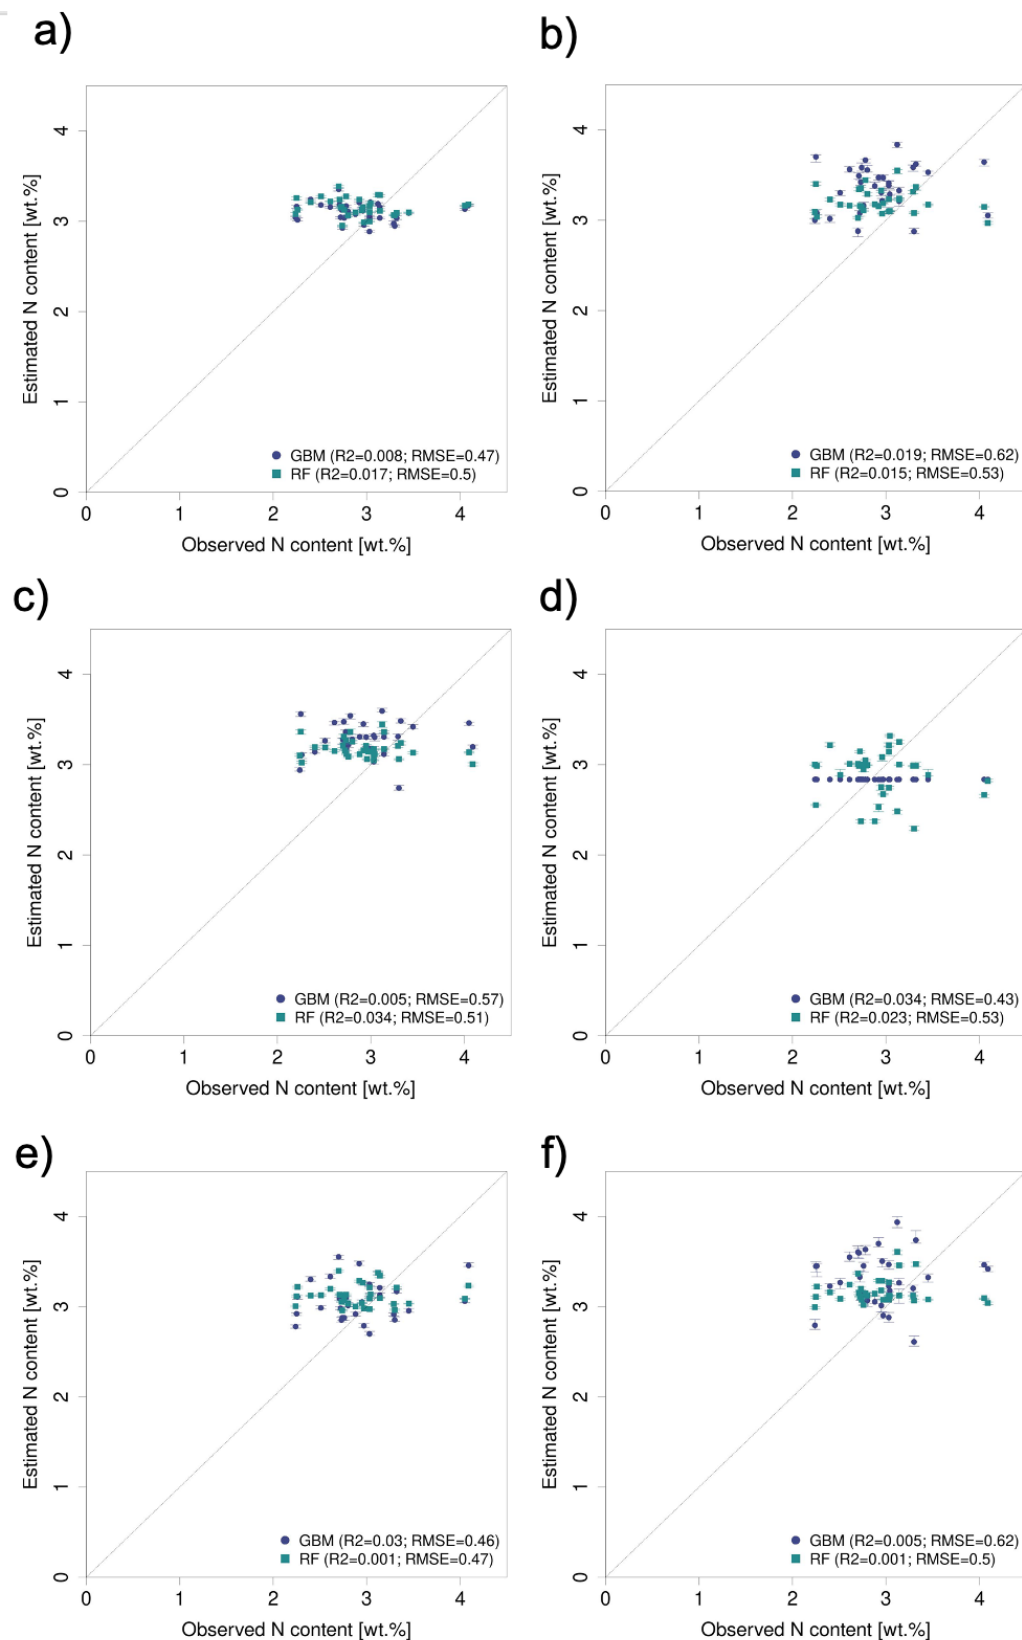

**Figure SF9.** Prediction plots of N concentration for validation site (EL) with SEQ data: a) for predictor set PS1 (raw reflectance data), b) for PS2 (VI), c) for PS3 (raw reflectance data + VI), d) for PS4 (canopy height), e) for PS5 (raw reflectance data + canopy height), f) for PS6 (raw reflectance data + VI + canopy height). The error bars reflect 90% prediction intervals, defined by 5<sup>th</sup> and 95<sup>th</sup> percentiles of the 10 iterations.



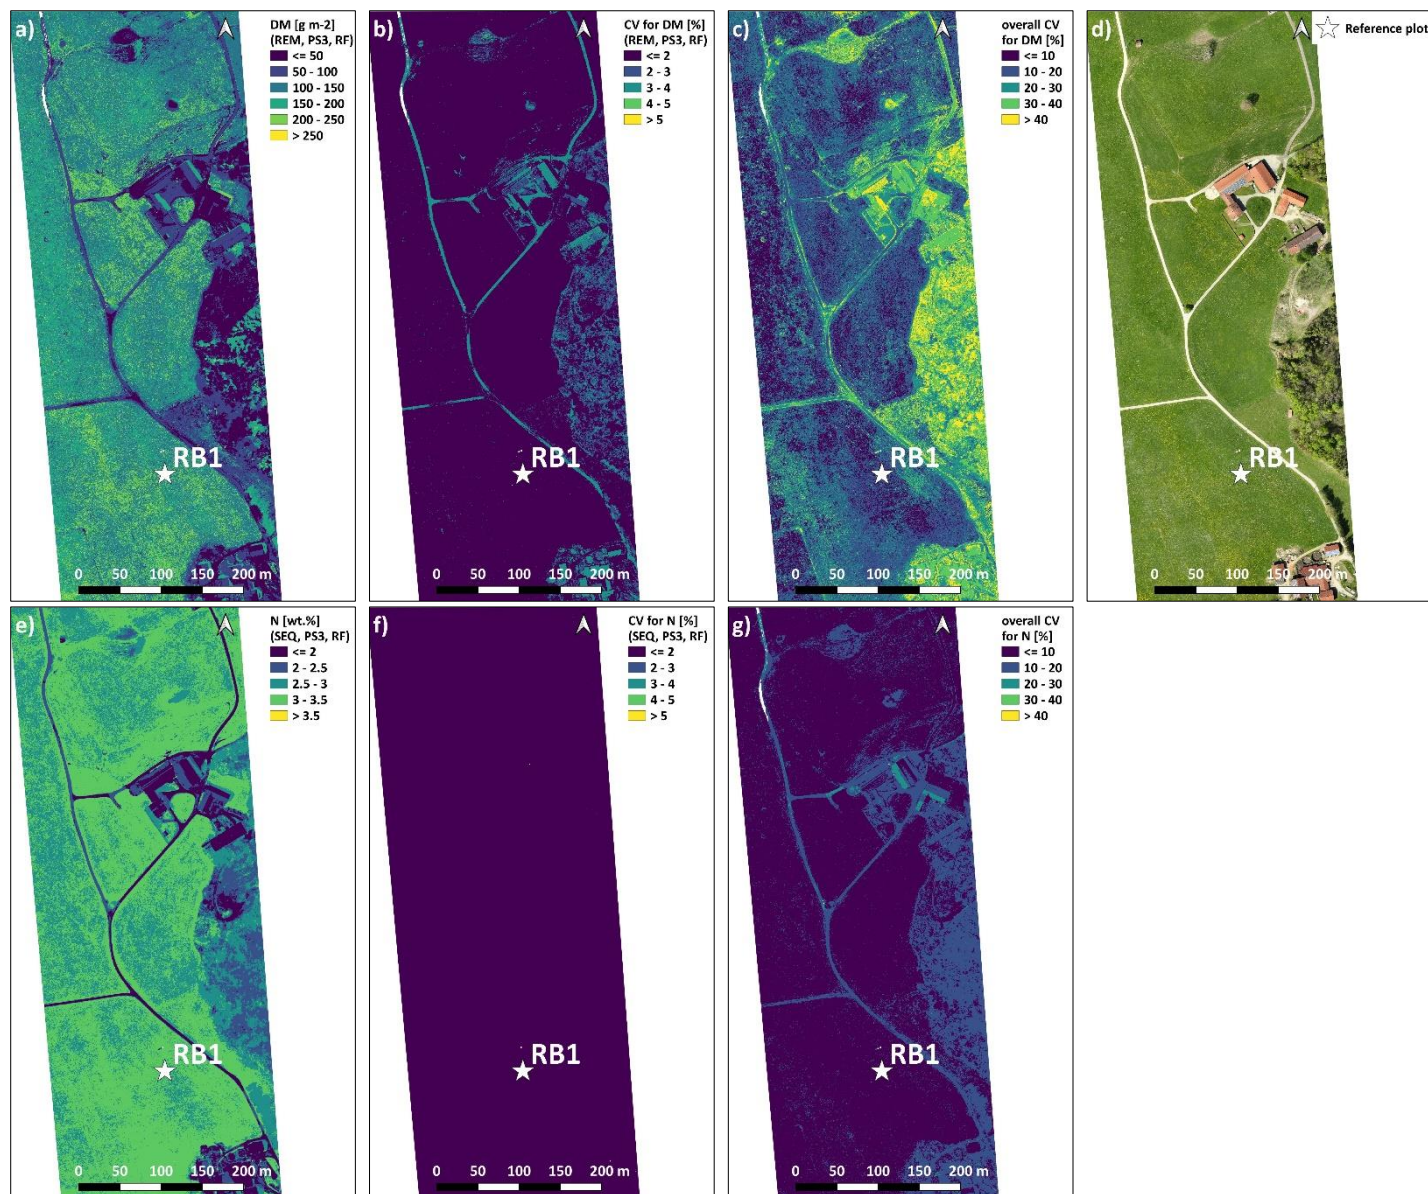

**Figure SF10.** Spatial estimations for RB-South site. a) mean DM with REM-PS3-RF-combination, b) CV of DM with REM-PS3-RF-combination, c) overall CV of DM for all PS1, PS2 and PS3 models, d) orthophoto for comparison, e) mean N concentration with SEQ+PS3+RF, f) CV of N concentration with SEQ+PS3+RF, g) overall CV of N concentration for all PS1, PS2 and PS3 models



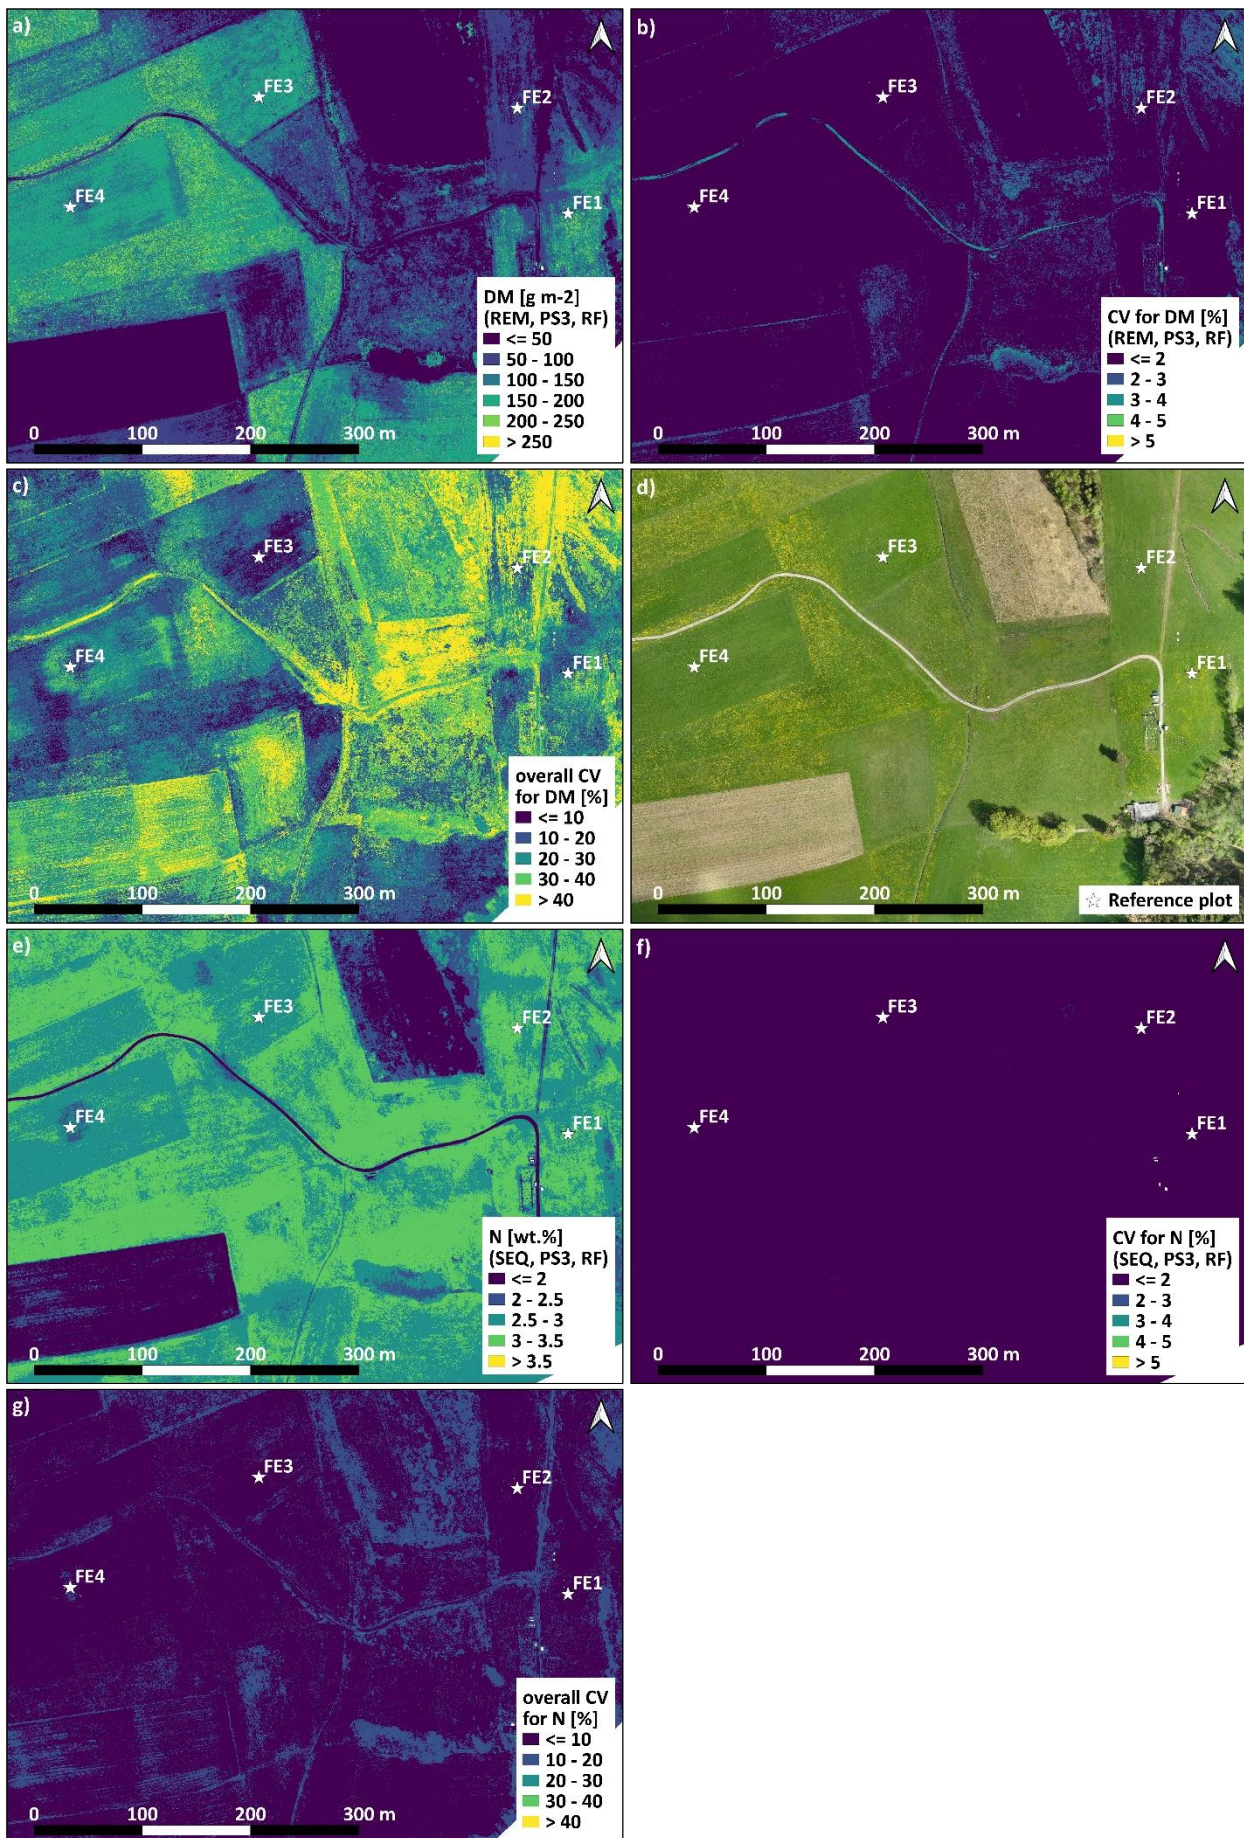

**Figure SF11.** Spatial estimations for FE site. a) mean DM with REM-PS3-RF-combination, b) CV of DM with REM-PS3-RF-combination, c) overall CV of DM for all PS1, PS2 and PS3 models, d) orthophoto for comparison, e) mean N concentration with SEQ-PS3-RF-combination, b) CV of N concentration with SEQ-PS3-RF-combination, c) overall CV of N concentration for all PS1, PS2 and PS3 models



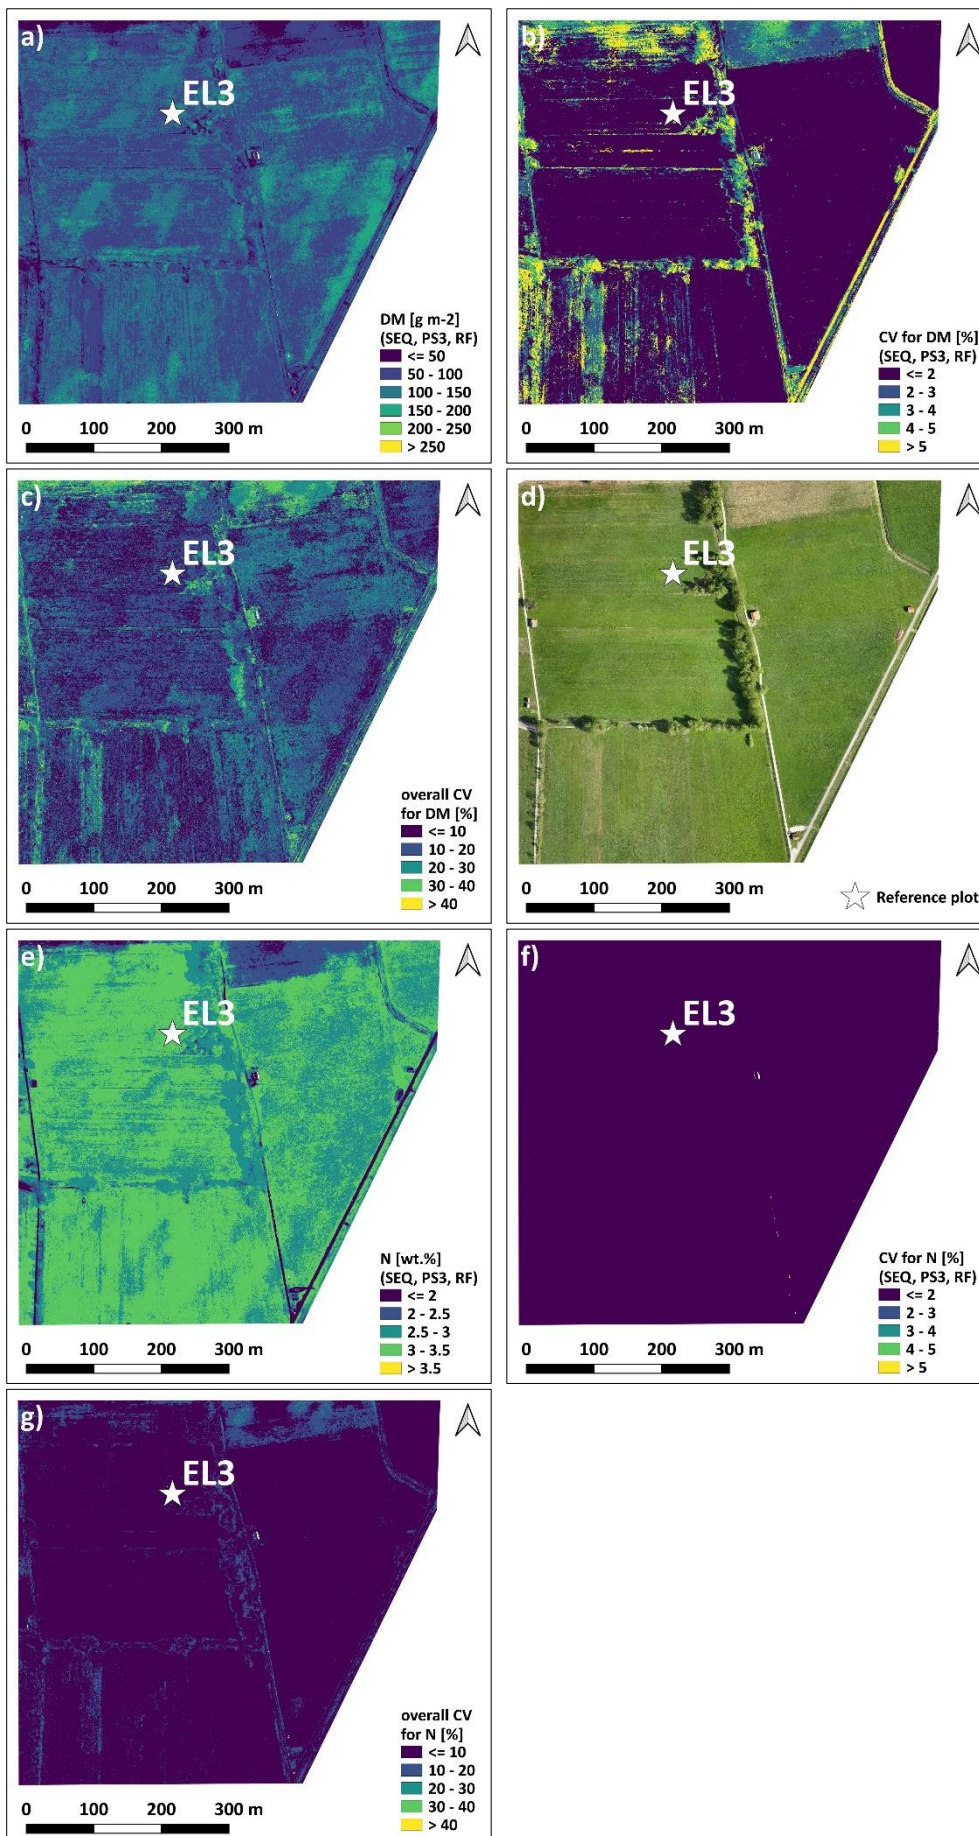

**Figure SF12.** Spatial estimations for EL-North site. a) mean DM with SEQ-PS3-RF-combination, b) CV of DM with SEQ-PS3-RF-combination, c) overall CV of DM for all PS1, PS2 and PS3 models, d) orthophoto for comparison, e) mean N concentration with SEQ-PS3-RF-combination, f) CV of N concentration with SEQ-PS3-RF-combination, g) overall CV of N concentration for all PS1, PS2 and PS3 models

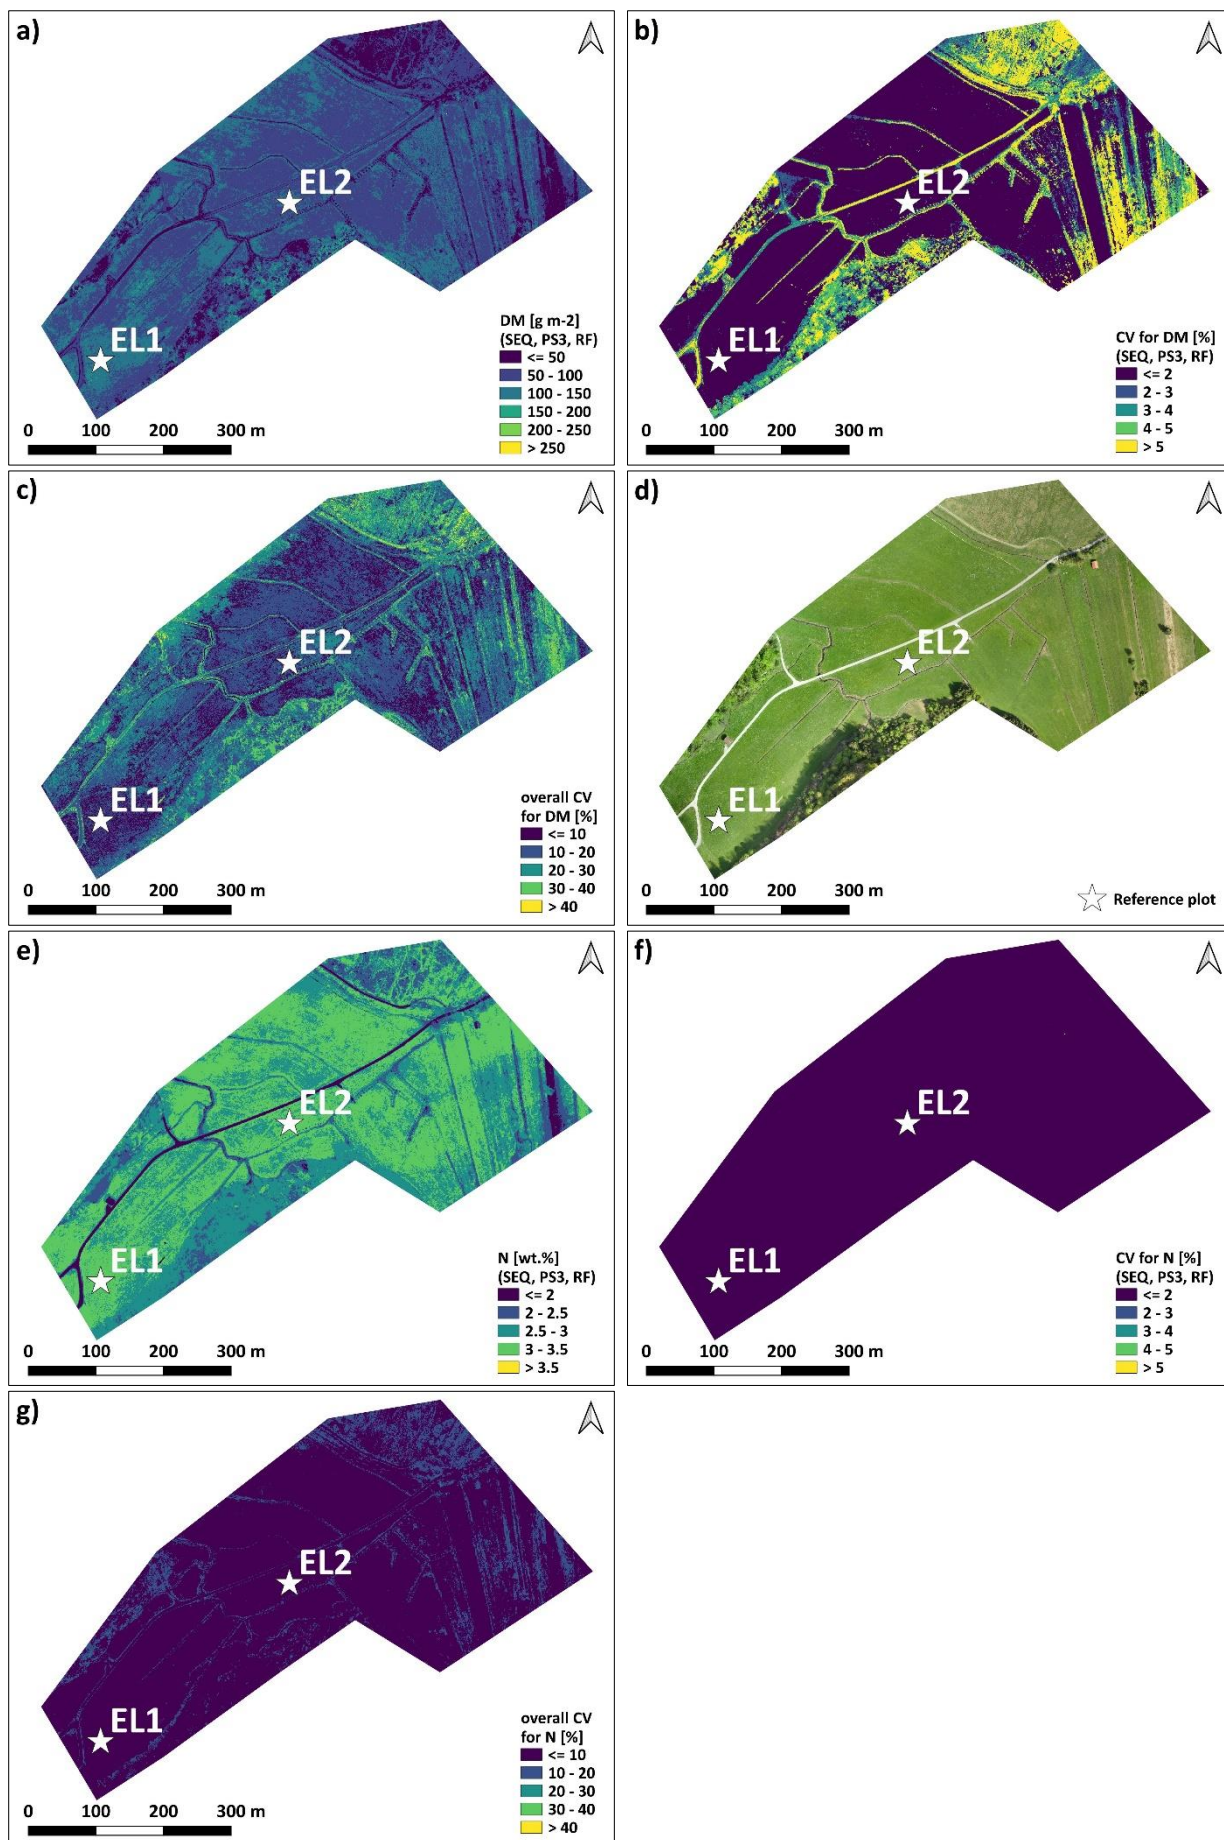

**Figure SF13.** Spatial estimations for EL-South site. a) mean DM with SEQ-PS3-RF-combination, b) CV of DM with SEQ-PS3-RF-combination, c) overall CV of DM for all PS1, PS2 and PS3 models, d) orthophoto for comparison, e) mean N concentration with SEQ-PS3-RF-combination, b) CV of N concentration with SEQ-PS3-RF-combination, c) overall CV of N concentration for all PS1, PS2 and PS3 models

## References of supplementary material

- Asam, S.: Potential of high resolution remote sensing data for Leaf Area Index derivation using statistical and physical models, PhD thesis, Julius-Maximilians-University Würzburg, Würzburg, 228 pp., 2014.
- Blackburn, G. A.: Quantifying chlorophylls and carotenoids at leaf and canopy scales: An evaluation of some hyperspectral approaches, *Remote Sens. Environ.*, 66, 273–285, [https://doi.org/10.1016/S0034-4257\(98\)00059-5](https://doi.org/10.1016/S0034-4257(98)00059-5), 1998.
- Blackburn, G. A.: Relationships between spectral reflectance and pigment concentrations in stacks of deciduous broadleaves, *Remote Sens. Environ.*, 70, 224–237, [https://doi.org/10.1016/S0034-4257\(99\)00048-6](https://doi.org/10.1016/S0034-4257(99)00048-6), 1999.
- Broge, N. H. and Leblanc, E.: Comparing prediction power and stability of broadband and hyperspectral vegetation indices for estimation of green leaf area index and canopy chlorophyll density, *Remote Sens. Environ.*, 76, 156–172, [https://doi.org/10.1016/S0034-4257\(00\)00197-8](https://doi.org/10.1016/S0034-4257(00)00197-8), 2001.
- Chappelle, E. W., Kim, M. S., and McMurtrey, J. E.: Ratio analysis of reflectance spectra (RARS): An algorithm for the remote estimation of the concentrations of chlorophyll A, chlorophyll B, and carotenoids in soybean leaves, *Remote Sens. Environ.*, 39, 239–247, [https://doi.org/10.1016/0034-4257\(92\)90089-3](https://doi.org/10.1016/0034-4257(92)90089-3), 1992.
- Chen, J. M.: Evaluation of vegetation indices and a modified simple ratio for Boreal applications, *Can. J. Remote Sens.*, 22, 229–242, <https://doi.org/10.1080/07038992.1996.10855178>, 1996.
- Datt, B.: Visible/near infrared reflectance and chlorophyll concentration in Eucalyptus leaves, *Int. J. Remote Sens.*, 20, 2741–2759, <https://doi.org/10.1080/014311699211778>, 1999.
- Daughtry, C. S., Walthall, C., Kim, M., de Colstoun, E. B., and McMurtrey, J.: Estimating corn leaf chlorophyll concentration from leaf and canopy reflectance, *Remote Sens. Environ.*, 74, 229–239, [https://doi.org/10.1016/S0034-4257\(00\)00113-9](https://doi.org/10.1016/S0034-4257(00)00113-9), 2000.
- Ehammer, A., Fritsch, S., Conrad, C., Lamers, J., and Dech, S.: Statistical derivation of fPAR and LAI for irrigated cotton and rice in arid Uzbekistan by combining multi-temporal RapidEye data and ground measurements, *Proc.SPIE*, <https://doi.org/10.1117/12.864796>, 2010.
- Gitelson, A. and Merzlyak, M. N.: Spectral reflectance changes associated with autumn senescence of *Aesculus hippocastanum* L. and *Acer platanoides* L. leaves. Spectral features and relation to chlorophyll estimation, *J. Plant Physiol.*, 143, 286–292, [https://doi.org/10.1016/S0176-1617\(11\)81633-0](https://doi.org/10.1016/S0176-1617(11)81633-0), 1994.
- Gitelson, A. A. and Merzlyak, M. N.: Remote estimation of chlorophyll concentration in higher plant leaves, *Int. J. Remote Sens.*, 18, 2691–2697, <https://doi.org/10.1080/014311697217558>, 1997.
- Haboudane, D., Miller, J. R., Pattey, E., Zarco-Tejada, P. J., and Strachan, I. B.: Hyperspectral vegetation indices and novel algorithms for predicting green LAI of crop canopies: Modeling and validation in the context of precision agriculture, *Remote Sens. Environ.*, 90, 337–352, <https://doi.org/10.1016/j.rse.2003.12.013>, 2004.
- Huete, A., Didan, K., Miura, T., Rodriguez, E., Gao, X., and Ferreira, L.: Overview of the radiometric and biophysical performance of the MODIS vegetation indices, *Remote Sens. Environ.*, 83, 195–213, [https://doi.org/10.1016/S0034-4257\(02\)00096-2](https://doi.org/10.1016/S0034-4257(02)00096-2), 2002.
- Huete, A. R.: A soil-adjusted vegetation index (SAVI), *Remote Sens. Environ.*, 25, 295–309, [https://doi.org/10.1016/0034-4257\(88\)90106-X](https://doi.org/10.1016/0034-4257(88)90106-X), 1988.
- Jordan, C. F.: Derivation of leaf-area index from quality of light on the forest floor, *Ecology*, 50, 663–666, 1969.
- Kaufman, Y. J. and Tanre, D.: Atmospherically resistant vegetation index (ARVI) for EOS-MODIS, *IEEE T. Geosci. Remote*, 30, 261–270, <https://doi.org/10.1109/36.134076>, 1992.
- Ollinger, S. V.: Sources of variability in canopy reflectance and the convergent properties of plants, *New Phytol.*, 189, 375–394, <https://doi.org/10.1111/j.1469-8137.2010.03536.x>, 2011.
- Pearson, R. L., Miller, L. D.: Remote mapping of standing crop biomass for estimation of the productivity of the shortgrass prairie, Pawnee National Grasslands, Colorado, in: *Proceedings of the Eighth International Symposium on Remote Sensing of Environment Dept.*, Fort Collins, Colorado, 1357-1381, 1972.
- Penuelas, J., Baret, F., and Filella, I.: Semi-Empirical Indices to Assess Carotenoids/Chlorophyll-a Ratio from Leaf Spectral Reflectance, *Photosynthetica*, 32, 221–230, 1995.
- Qi, J., Chehbouni, A., Huete, A. R., Kerr, Y. H., and Sorooshian, S.: A modified soil adjusted vegetation index, *Remote Sens. Environ.*, 48, 119–126, [https://doi.org/10.1016/0034-4257\(94\)90134-1](https://doi.org/10.1016/0034-4257(94)90134-1), 1994.
- Rondeaux, G., Steven, M., and Baret, F.: Optimization of soil-adjusted vegetation indices, *Remote Sens. Environ.*, 55, 95–107, [https://doi.org/10.1016/0034-4257\(95\)00186-7](https://doi.org/10.1016/0034-4257(95)00186-7), 1996.
- Roujean, J.-L. and Breon, F.-M.: Estimating PAR absorbed by vegetation from bidirectional reflectance measurements, *Remote Sens. Environ.*, 51, 375–384, [https://doi.org/10.1016/0034-4257\(94\)00114-3](https://doi.org/10.1016/0034-4257(94)00114-3), 1995.
- Rouse, J., Haas, R., Schell, J., and Deering, J.: Monitoring vegetation systems in the Great Plains with ERTS, in: *NASA SP- 351: Proceedings of the Third Symposium on Significant Results Obtained with ERTS-1, Third Symposium on Significant Results Obtained with ERTS-1*, Washington, D.C., 309–317, 1974.
- Sims, D. A. and Gamon, J. A.: Relationships between leaf pigment concentration and spectral reflectance across a wide range of species, leaf structures and developmental stages, *Remote Sens. Environ.*, 81, 337–354, [https://doi.org/10.1016/S0034-4257\(02\)00010-X](https://doi.org/10.1016/S0034-4257(02)00010-X), 2002.
